# Supplementary material for: Determining the composition of gold nanoparticles: a compilation of shapes, sizes, and calculations using geometric considerations
Source: Springer Nature journal article supplement (doi:10.1007/s11051-016-3587-7), 2016-10-01
Supplement: MOESM1 [file 10807844]

# **A Practical Guide to Calculate the Number of Atoms and Overall Composition of Metal Nanoparticles using Geometric Considerations**

Taizo Mori\*<sup>#</sup> and Torsten Hegmann\*

Chemical Physics Interdisciplinary Program, Liquid Crystal Institute, Kent State University,  
Kent, OH 44242-0001 U.S.A.

## **Electronic Supplementary Material**

| <b>Section</b>                                                                       | <b>Page</b> |
|--------------------------------------------------------------------------------------|-------------|
| Section S1 – Equations and calculations for Platonic, Archimedean and Catalan solids | 2           |
| Section S2 – Data for polyhedra                                                      | 14          |
| Section S3 – Data for Archimedean Icosahedra                                         | 27          |
| Section S4 – Data for Archimedean Cubes                                              | 32          |
| Section S5 – Example calculations                                                    | 41          |
| Section S6 – <i>xyz</i> Coordinates                                                  | 46          |
| References                                                                           | 46          |

## Section S1 – Equations and calculations for Platonic, Archimedean and Catalan solids<sup>[S1]</sup>

### Platonic Solids

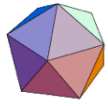

**Icosahedron**  
 Vertices: 12  
 Faces: 20 [3]  
 Edges: 30  
 Dual solid: Dodecahedron

$$V = \frac{5(3 + \sqrt{5})}{12} L^3 = 2.182L^3$$

$$S = 5\sqrt{3}L^2 = 8.660L^2$$

$$R_c = \frac{\sqrt{10 + 2\sqrt{5}}}{4} L = 0.9511L$$

$$R_m = \frac{1 + \sqrt{5}}{4} L = 0.8090L$$

$$R_i = \frac{3\sqrt{3} + \sqrt{15}}{12} L = 0.7558L$$

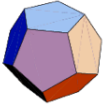

**Dodecahedron**  
 Vertices: 20  
 Faces: 12 [5]  
 Edges: 30  
 Dual solid: Icosahedron

$$V = \frac{15 + 7\sqrt{5}}{4} L^3 = 7.663L^3$$

$$S = 3\sqrt{25 + 10\sqrt{5}}L^2 = 20.65L^2$$

$$R_c = \frac{\sqrt{3} + \sqrt{15}}{4} L = 1.4013L$$

$$R_m = \frac{3 + \sqrt{5}}{4} L = 1.3090L$$

$$R_i = \frac{\sqrt{10(25 + 11\sqrt{5})}}{20} L = 1.1135L$$

### Archimedean Solids

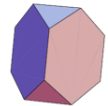

**Truncated Tetrahedron**  
 Vertices: 12  
 Faces: 8 = 4[3] + 4[6]  
 Edges: 18  
 Dual solid: Triakis Tetrahedron

$$V = \frac{23}{12}\sqrt{2}L^3 = 2.711L^3$$

$$S = 7\sqrt{3}L^2 = 12.12L^2$$

$$R_c = \frac{\sqrt{22}}{4} L = 1.1726L$$

$$R_m = \frac{3\sqrt{2}}{4} L = 1.0606L$$

$$[3]: R_i = \frac{5\sqrt{6}}{12} L = 1.0206L$$

$$[6]: R_i = \frac{\sqrt{6}}{4} L = 0.6123L$$

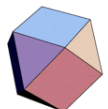

**Cuboctahedron**  
 Vertices: 12  
 Faces: 14 = 8[3] + 6[4]  
 Edges: 24  
 Dual solid: Rhombic Dodecahedron

$$V = \frac{5}{3}\sqrt{2}L^3 = 2.357L^3$$

$$S = (6 + 2\sqrt{3})L^2 = 9.464L^2$$

$$R_c = L$$

$$R_m = \frac{\sqrt{3}}{2} L = 0.8660L$$

$$[3]: R_i = \frac{\sqrt{6}}{3} L = 0.8165L$$

$$[4]: R_i = \frac{\sqrt{2}}{2} L = 0.7071L$$

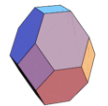

**Truncated Octahedron**  
 Vertices: 24  
 Faces: 14 = 6[4] + 8[6]  
 Edges: 36  
 Dual solid: Tetrakis Hexahedron

$$V = 8\sqrt{2}L^3 = 11.31L^3$$

$$S = 6(1 + 2\sqrt{3})L^2 = 26.78L^2$$

$$R_c = \frac{\sqrt{10}}{2} L = 1.5811L$$

$$R_m = 1.5L$$

$$[4]: R_i = \sqrt{2}L = 1.4142L$$

$$[6]: R_i = \frac{\sqrt{6}}{2} L = 1.2247L$$

*V: Volume, S: Surface area, L: Edge length, R<sub>c</sub>: Circumscribed radius, R<sub>m</sub>: Midscribed radius, R<sub>i</sub>: Inscribed radius*

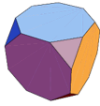

**Truncated Cube**  
 Vertices: 24  
 Faces: 14 = 8[3] + 6[8]  
 Edges: 36  
 Dual solid: Triakis Octahedron

$$V = 7 \left( 1 + \frac{2\sqrt{2}}{3} \right) L^3 = 13.56L^3 \quad S = 2(6 + 6\sqrt{2} + \sqrt{3})L^2 = 32.43L^2$$

$$R_c = \frac{\sqrt{7 + 4\sqrt{2}}}{2} L = 1.7789L \quad R_m = \left( 1 + \frac{\sqrt{2}}{2} \right) L = 1.7071L \quad [3]: R_i = \frac{3\sqrt{3} + 2\sqrt{6}}{6} L = 1.6825L$$

$$[8]: R_i = \frac{1 + \sqrt{2}}{2} L = 1.2071L$$

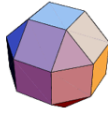

**Rhombicuboctahedron**  
 Vertices: 24  
 Faces: 26 = 8[3] + 18[4]  
 Edges: 48  
 Dual solid: Deltoidal Icositetrahedron

$$V = \frac{2}{3} (6 + 5\sqrt{2}) L^3 = 8.7140L^3 \quad S = (18 + 2\sqrt{3}) L^2 = 21.46L^2$$

$$R_c = \frac{\sqrt{5 + 2\sqrt{2}}}{2} L = 1.3990L \quad R_m = \frac{\sqrt{2(2 + \sqrt{2})}}{2} L = 1.3066L \quad [3]: R_i = \frac{3\sqrt{3} + \sqrt{6}}{6} L = 1.2743L$$

$$[4]: R_i = \frac{1 + \sqrt{2}}{2} L = 1.2071L$$

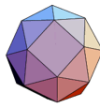

**Snub Cube (enantiomer)**  
 Vertices: 24  
 Faces: 38 = 32[3] + 6[4]  
 Edges: 60  
 Dual solid: Pentagonal Icositetrahedron

$$V = \frac{3\sqrt{\tau - 1} + 4\sqrt{\tau + 1}}{3\sqrt{2 - \tau}} L^3 = 7.8895L^3 \quad S = (6 + 8\sqrt{3}) L^2 = 18.86L^2$$

$$R_c = \frac{\sqrt{d^2 + L^2}}{2} = 1.3437L \quad R_m = \frac{1}{\sqrt{4(2 - \tau)}} L = 1.2472L \quad [3]: R_i = \frac{\sqrt{d^2 - L^2}}{2} = 1.2134L$$

$$\tau = (X^3 - X^2 - X - 1)_1 \quad d = \frac{L}{\sqrt{2 - \tau}} \quad [4]: R_i = \frac{1}{2} \sqrt{d^2 - \frac{L^2}{3}} = 1.1426L$$

$$= \frac{1}{3} \left( 1 + \sqrt[3]{19 - 2\sqrt{33}} + \sqrt[3]{19 + 2\sqrt{33}} \right) = 1.83929$$

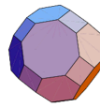

**Truncated Cuboctahedron**  
 Vertices: 48 (48[3])  
 Faces: 26 = 12[4] + 8[6] + 6[8]  
 Edges: 72  
 Dual solid: Disdyakis Dodecahedron

$$V = (22 + 14\sqrt{2}) L^3 = 41.79L^3 \quad S = 12(2 + \sqrt{2} + \sqrt{3}) L^2 = 61.76L^2$$

$$R_c = \frac{\sqrt{13 + 6\sqrt{2}}}{2} L = 2.3176L \quad R_m = \frac{\sqrt{12 + 6\sqrt{2}}}{2} L = 2.2630L \quad [4]: R_i = \frac{3 + \sqrt{2}}{2} L = 2.2071L$$

$$[6]: R_i = \frac{\sqrt{3} + \sqrt{6}}{2} L = 2.0908L$$

$$[8]: R_i = \frac{1 + 2\sqrt{2}}{2} L = 1.9142L$$

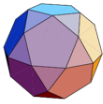**Icosidodecahedron**

Vertices: 30  
 Faces: 32 = 20[3] + 12[5]  
 Edges: 60  
 Dual solid: Rhombic  
 Triacontahedron

$$V = \frac{45 + 17\sqrt{5}}{6} L^3 = 13.84L^3$$

$$S = (5\sqrt{3} + 3\sqrt{5}\sqrt{5 + 2\sqrt{5}}) L^2 = 29.31L^2$$

$$R_c = \frac{1 + \sqrt{5}}{2} L = 1.6180L$$

$$R_m = \frac{\sqrt{5 + 2\sqrt{5}}}{2} L = 1.5388L$$

$$[3]: R_{in} = \sqrt{\frac{7 + 3\sqrt{5}}{6}} = 1.5115L$$

$$[5]: R_{in} = \sqrt{\frac{5 + 2\sqrt{5}}{5}} L = 1.3764L$$

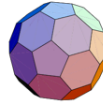**Truncated Icosahedron**

Vertices: 60  
 Faces: 32 = 12[5] + 20[6]  
 Edges: 90  
 Dual solid: Pentakis Dodecahedron

$$V = \frac{125 + 43\sqrt{5}}{4} L^3 = 55.29L^3$$

$$S = 3(10\sqrt{3} + \sqrt{5}\sqrt{5 + 2\sqrt{5}}) L^2 = 72.61L^2$$

$$R_c = \frac{\sqrt{58 + 18\sqrt{5}}}{4} L = 2.4780L$$

$$R_m = \frac{3(1 + \sqrt{5})}{4} L = 2.4271L$$

$$[5]: R_i = \frac{\sqrt{10(125 + 41\sqrt{5})}}{20} = 2.3274L$$

$$[6]: R_i = \frac{3\sqrt{5} + \sqrt{15}}{4} = 2.2672L$$

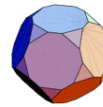**Truncated Dodecahedron**

Vertices: 60  
 Faces: 32 = 20[3] + 12[10]  
 Edges: 90  
 Dual solid: Triakis Icosahedron

$$V = \frac{5}{12} (99 + 47\sqrt{5}) L^3 = 85.04L^3$$

$$S = 5(\sqrt{3} + 6\sqrt{5 + 2\sqrt{5}}) L^2 = 100.99L^2$$

$$R_c = \frac{\sqrt{2(37 + 15\sqrt{5})}}{4} L = 2.9695L$$

$$R_m = \frac{5 + 3\sqrt{5}}{4} L = 2.9271L$$

$$[3]: R_i = \frac{9\sqrt{3} + 5\sqrt{15}}{12} = 2.9128L$$

$$[10]: R_i = \frac{\sqrt{2(25 + 11\sqrt{5})}}{4} L = 2.499L$$

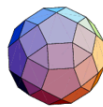**Rhombicosidodecahedron**

Vertices: 60  
 Faces: 62 = 20[3] + 30[4] + 12[5]  
 Edges: 120  
 Dual solid: Deltoidal Hexecontahedron

$$V = \left(20 + \frac{29}{3}\sqrt{5}\right) L^3 = 41.62L^3$$

$$S = \left\{30 + \sqrt{30\left[10 + 3\sqrt{5} + \sqrt{15(5 + 2\sqrt{5})}\right]}\right\} L^2 = 59.31L^2$$

$$R_c = \frac{\sqrt{11 + 4\sqrt{5}}}{2} L = 2.2330L$$

$$R_m = \frac{\sqrt{2(5 + 2\sqrt{5})}}{2} L = 2.1763L$$

$$[3]: R_i = \frac{3\sqrt{3} + 2\sqrt{15}}{6} = 2.1571L$$

$$[4]: R_i = \frac{2 + \sqrt{5}}{2} = 2.1180L$$

$$[5]: R_i = \frac{3\sqrt{5(5 + 2\sqrt{5})}}{10} = 2.0653L$$

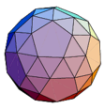**Snub Dodecahedron (enantiomer)**

Vertices: 60  
 Faces: 92 = 80[3] + 12[5]  
 Edges: 150  
 Dual solid: Pentagonal Hexecontahedron

$$V = \frac{12\xi^2(3\phi + 1) - \xi(36\phi + 7) - (53\phi + 6)}{6\sqrt{6 - \xi^2}} L^3 = 37.62L^3$$

$$S = 20\sqrt{3} + 3\sqrt{25 + 10\sqrt{5}} = 55.289$$

$$R_c = \phi\sqrt{\xi(\xi + \phi)} + \frac{3 - \phi}{2} = 2.1558L$$

$$[3]: R_i = \frac{\phi\xi\sqrt{3[\xi(\xi + \phi) + 1]}}{6} = 2.0771L$$

$$R_m = \frac{\phi\sqrt{\xi(\xi + \phi) + 1}}{2} L = 2.0971L$$

$$[5]: R_i = \sqrt{20\left[5\left(\xi + \frac{1}{\xi}\right)(2\phi + 1)\right] + \frac{11\phi + 12}{20}} = 1.9809L$$

$$\phi = \frac{1 + \sqrt{5}}{2} \quad \xi = \sqrt[3]{\frac{\phi + \sqrt{\phi - 5/27}}{2}} + \sqrt[3]{\frac{\phi - \sqrt{\phi - 5/27}}{2}}$$

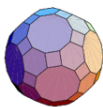**Truncated Icosidodecahedron**

Vertices: 120  
 Faces: 62 = 30[4] + 20[6] + 12[12]  
 Edges: 180  
 Dual solid: Disdyakis Triacontahedron

$$V = (95 + 50\sqrt{5}) L^3 = 206.80L^3$$

$$S = 30\left(1 + \sqrt{2\left(4 + \sqrt{5} + \sqrt{15 + 6\sqrt{6}}\right)}\right) L^2 = 175.03L^2$$

$$R_c = \frac{\sqrt{31 + 12\sqrt{5}}}{2} L = 3.8024L$$

$$[4]: R_i = \frac{3 + 2\sqrt{5}}{2} = 3.7361L$$

$$[6]: R_i = \frac{2\sqrt{3} + \sqrt{15}}{2} = 3.6685L$$

$$R_m = \frac{\sqrt{6(5 + 2\sqrt{2})}}{2} L = 3.7694L$$

$$[12]: R_i = \frac{\sqrt{5(5 + 2\sqrt{5})}}{2} = 3.4410L$$



## Catalan Solids

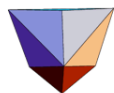

**Triakis Tetrahedron**  
 Vertices: 8  
 Faces: 12 (isosceles triangles)  
 Edges: 18 = 12L<sub>s</sub> + 6L<sub>l</sub>  
 Dual solid: Truncated Tetrahedron

$$V = \frac{8\sqrt{2}}{20}a^3 = 5.7276a^3$$

$$[3]: R_v = \frac{9\sqrt{6}}{20}a = 1.1023a$$

$$[6]: R_v = \frac{3\sqrt{6}}{4}a = 1.8371a$$

$$S = \frac{27}{5}\sqrt{11}a^2 = 17.91$$

$$R_e = \frac{3\sqrt{2}}{3}a = 1.0607a$$

$$L_s = \frac{9}{5}a = 1.8a$$

$$L_l = 3a$$

$$R_l = \frac{9\sqrt{22}}{44}a = 0.9594a$$

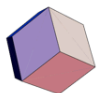

**Rhombic Dodecahedron**  
 Vertices: 14  
 Faces: 12 (rhombi)  
 Edges: 24  
 Dual solid: Cuboctahedron

$$V = \frac{27\sqrt{2}}{16}a^3 = 2.3865a^3$$

$$[3]: R_v = \frac{3\sqrt{6}}{8}a = 0.9186a$$

$$[4]: R_v = \frac{3\sqrt{2}}{4}a = 1.0607a$$

$$S = \frac{4\sqrt{2}}{27}a^2 = 9.5460a^2$$

$$R_e = \frac{2\sqrt{2}}{3}a = 0.9428a$$

$$L = \frac{3\sqrt{6}}{8}a = 0.9186a$$

$$R_l = \frac{3}{4}a = 0.75a$$

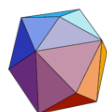

**Tetrakis Hexahedron**  
 Vertices: 14  
 Faces: 24 (isosceles triangles)  
 Edges: 36 = 24L<sub>s</sub> + 12L<sub>l</sub>  
 Dual solid: Truncated Octahedron

$$V = \frac{81\sqrt{2}}{8}a^3 = 14.32a^3$$

$$[4]: R_v = \frac{9\sqrt{2}}{8}a = 1.5910a$$

$$[6]: R_v = \frac{3\sqrt{6}}{4}a = 1.8371a$$

$$S = \frac{27\sqrt{5}}{2}a^2 = 30.19a^2$$

$$R_e = \frac{3}{2}a = 1.5a$$

$$L_s = \frac{9\sqrt{2}}{8}a = 1.5910a$$

$$L_l = \frac{3\sqrt{2}}{2}a = 2.1213a$$

$$R_l = \frac{9\sqrt{10}}{20}a = 1.423a$$

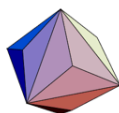

**Triakis Octahedron**  
 Vertices: 14  
 Faces: 24 (isosceles triangles)  
 Edges: 36 = 24L<sub>s</sub> + 12L<sub>l</sub>  
 Dual solid: Truncated Cube

$$V = 4(3 + \sqrt{2})a^3 = 23.31a^3$$

$$[3]: R_v = \sqrt{3}a = 1.7321a$$

$$[8]: R_v = (1 + \sqrt{2})a = 2.4142a$$

$$S = 12\sqrt{7 + 4\sqrt{2}}a^2 = 42.69a^2$$

$$R_e = 1 + \frac{\sqrt{2}}{2}a = 1.7072a$$

$$L_s = 2a$$

$$L_l = (2 + \sqrt{2})a = 3.4142a$$

$$R_l = \frac{\sqrt{17(23 + 16\sqrt{2})}}{17}a = 1.6383a$$

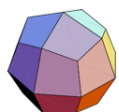

**Deltoidal Icositetrahedron**  
 Vertices: 26  
 Faces: 24 (tri-equiangular kites)  
 Edges: 48 = 24L<sub>s</sub> + 24L<sub>l</sub>  
 Dual solid: Rhombicuboctahedron

$$V = \sqrt{122 + 71\sqrt{2}}L_s^3 = \frac{16(1 + 2\sqrt{2})}{8.7507}a^3$$

$$[3]: R_v = \frac{4\sqrt{3} + \sqrt{6}}{7}a = 1.3397a$$

$$[4]: R_v = \sqrt{2}a = 1.4142a$$

$$S = 6\sqrt{29 - 2\sqrt{2}}L_s^2 = 21.51a^2$$

$$R_e = \frac{\sqrt{2(2 + \sqrt{2})}}{2}a = 1.3066a$$

$$L_s = \frac{2\sqrt{10 - \sqrt{2}}}{7}a = 0.8372a$$

$$L_l = \sqrt{2(2 - \sqrt{2})}a = 1.0824a$$

$$R_l = \frac{\sqrt{34(7 + 4\sqrt{2})}}{17}a = 1.2203a$$

*a: Edge length of dual solid, R<sub>v</sub>: Vertex radius, R<sub>e</sub>: Edge – scribed radius*

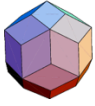

**Rhombic Triacontahedron**  
 Vertices: 32  
 Faces: 30 (rhombi)  
 Edges: 60  
 Dual solid: Icosidodecahedron

$$V = 4\sqrt{5+2\sqrt{5}}L^3 = 12.31L^3$$

$$= \frac{25\sqrt{5+2\sqrt{5}}}{16}a^3 = 14.80a^3$$

$$S = 12\sqrt{5}L^2 = 26.84L^2 = 30.34a^2$$

$$L = \frac{\sqrt{10(5+\sqrt{5})}}{8}a = 1.0633a$$

$$[3]: R_{cs} = \frac{5\sqrt{3} + \sqrt{15}}{8}a = 1.5667a$$

$$R_e = \frac{\sqrt{5+2\sqrt{5}}}{2}a = 1.5388a$$

$$R_i = \frac{5+3\sqrt{5}}{8}a = 1.4635a$$

$$[5]: R_{cs} = \frac{\sqrt{5(5+2\sqrt{5})}}{4}a = 1.7204a$$

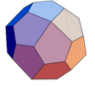

**Pentagonal Icositrahedron (enantiomer)**  
 Vertices: 38  
 Faces: 24 (mirror-symmetric pentagons)  
 Edges: 60 = 36L<sub>s</sub> + 24L<sub>l</sub>  
 Dual solid: Snub Cube

$$V = \frac{11(\tau-4)}{2(20\tau-37)}a^3$$

$$= 7.4474a^3$$

$$S = 3\sqrt{\frac{22(5\tau-1)}{4\tau-3}}a^2$$

$$= 19.2999a^2$$

$$L_s = \frac{1}{\sqrt{\tau+1}}a = 0.593465a$$

$$L_l = \frac{\sqrt{\tau+1}}{2}a = 1.0824a$$

$$[3]: R_v = \frac{\sqrt{2\left[6 + \sqrt[3]{6(9+\sqrt{33})} + \sqrt[3]{6(9-\sqrt{33})}\right]}}{4}a = 1.2820L$$

$$R_e = \frac{\sqrt{3\left[7 + \sqrt[3]{199+3\sqrt{33}} + \sqrt[3]{199-3\sqrt{33}}\right]}}{6}a = 1.2472a$$

$$[4]: R_v = \frac{\sqrt{6\left[14 + \sqrt[3]{2(1777+33\sqrt{33})} + \sqrt[3]{2(1777-33\sqrt{33})}\right]}}{12}a = 1.3614a$$

$$R_i = \frac{\sqrt{42\left[78 + \sqrt[3]{66(6039+49\sqrt{33})} + \sqrt[3]{66(6039-49\sqrt{33})}\right]}}{84}a = 1.1577a$$

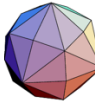

**Disdyakis Dodecahedron**  
 Vertices: 26  
 Faces: 48 (acute triangles)  
 Edges: 72 = 24L<sub>s</sub> + 24L<sub>m</sub> + 24L<sub>l</sub>  
 Dual solid: Truncated Cuboctahedron

$$V = \frac{144(1+\sqrt{2})}{7}a^3$$

$$= 49.6638a^3$$

$$S = \frac{6\sqrt{783+436\sqrt{2}}}{7}L_s^2$$

$$= 67.42a^2$$

$$L_s = \frac{2\sqrt{3(10-\sqrt{2})}}{7}a = 1.4500a$$

$$L_m = \frac{3\sqrt{6(2+\sqrt{2})}}{7}a = 1.9397a$$

$$L_l = \frac{2\sqrt{6(10+\sqrt{2})}}{7}a = 2.3644a$$

$$[4]: R_v = \frac{3(4+\sqrt{7})}{7}a = 2.3204a$$

$$[6]: R_v = \sqrt{6}a = 2.4495a$$

$$[8]: R_v = \frac{3(2+3\sqrt{2})}{7}a = 2.6754a$$

$$R_e = \frac{\sqrt{6(2+\sqrt{3})}}{2}a = 2.2630a$$

$$R_i = \frac{\sqrt{1746(15+8\sqrt{2})}}{97}a = 2.2097a$$

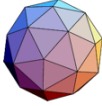

### Pentakis Dodecahedron

Vertices: 32  
 Faces: 60 (isosceles triangles)  
 Edges:  $90 = 60L_s + 30L_l$   
 Dual solid: Truncated Icosahedron

$$V = \frac{405(9 + \sqrt{5})}{76} a^3 = \frac{5(41 + 25\sqrt{5})}{36} L_s^3 = 59.88a^3$$

$$L_s = \frac{9(2\sqrt{5} - 1)}{19} a = 1.6447a$$

$$L_l = \frac{3(\sqrt{5} - 1)}{2} a = 1.8541a$$

$$R_e = \frac{3\sqrt{1 + \sqrt{5}}}{4} a = 2.4271a$$

$$S = \frac{5}{3} \sqrt{\frac{421 + 63\sqrt{5}}{2}} L_s^2 = 75.56a^2$$

$$[5]: R_v = \frac{9\sqrt{65 + 22\sqrt{5}}}{38} a = 2.5309a$$

$$[6]: R_v = \frac{3\sqrt{3}}{2} a = 2.5981a$$

$$R_i = \frac{9\sqrt{109(17 + 6\sqrt{5})}}{218} a = 2.3771a$$

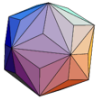

### Triakis Icosahedron

Vertices: 62  
 Faces: 60 (isosceles triangles)  
 Edges:  $90 = 60L_s + 30L_l$   
 Dual solid: Truncated Dodecahedron

$$V = \frac{125(19 + 9\sqrt{5})}{44} a^3 = 111.15a^3$$

$$L_s = \frac{5(7 + \sqrt{5})}{22} a = 2.0991a$$

$$L_l = \frac{5 + \sqrt{5}}{2} a = 3.6180a$$

$$R_e = \frac{5 + 3\sqrt{5}}{4} a = 2.9271a$$

$$S = \frac{75}{11} \sqrt{\frac{313 + 117\sqrt{5}}{2}} a^2 = 115.57a^2$$

$$[3]: R_v = \frac{5(3\sqrt{3} + 2\sqrt{15})}{22} a = 2.9414a$$

$$[10]: R_v = \frac{\sqrt{5(5 + 2\sqrt{5})}}{2} a = 3.4410a$$

$$R_i = \frac{5\sqrt{61(41 + 18\sqrt{5})}}{122} a = 2.8853a$$

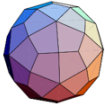

### Deltoidal Hexecontahedron

Vertices: 62  
 Faces: 60 (kites)  
 Edges:  $120 = 60L_s + 60L_l$   
 Dual solid: Rhombicosidodecahedron

$$V = \frac{100(5 + 4\sqrt{5})}{33} a^3 = 42.26a^3$$

$$L_s = \frac{\sqrt{5(85 - 31\sqrt{5})}}{11} a = 0.8050a$$

$$L_l = \frac{\sqrt{5(5 - \sqrt{5})}}{3} a = 1.2392a$$

$$R_e = \frac{\sqrt{2(5 + 2\sqrt{5})}}{2} a = 2.1763a$$

$$S = \frac{100}{11} \sqrt{79 - 16\sqrt{5}} a^2 = 59.77a^2$$

$$[3]: R_v = \frac{5\sqrt{3} + 4\sqrt{15}}{11} a = 2.1957a$$

$$[4]: R_v = \sqrt{5} a = 2.2361a$$

$$[5]: R_v = \frac{\sqrt{5(5 + 2\sqrt{5})}}{3} a = 2.2940a$$

$$R_i = \frac{\sqrt{205(19 + 8\sqrt{5})}}{41} a = 2.1210a$$

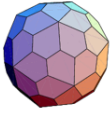

**Pentagonal Hexecontahedron (enantiomer)**

Vertices: 92 (80[3] + 12[5])  
 Faces: 60 (mirror-symmetric pentagons)  
 Edges: 150 = 90L<sub>s</sub> + 60L<sub>l</sub>  
 Dual solid: Snub Dodecahedron

$$L_s = \frac{1}{\xi} a = 0.5829a$$

$$L_l = \frac{\xi(7\phi + 2) + (5\phi - 3) + \frac{2}{\xi}(8 - 3\phi)}{31} a = 1.0200a$$

$$R_e = \frac{\phi\sqrt{\xi(\xi + \phi) + 1}}{2} a = 2.0971a$$

$$\phi = \frac{1 + \sqrt{5}}{2} \quad \xi = \sqrt[3]{\frac{\phi + \sqrt{\phi - 5/27}}{2}} + \sqrt[3]{\frac{\phi - \sqrt{\phi - 5/27}}{2}}$$

$$V = \frac{5\sqrt{\xi[\xi^2(11405\phi + 287) + \xi(14528\phi + 8265) + (2363\phi + 131416)]}}{62} a^3 = 37.59a^3$$

$$S = 55.28a^2$$

$$[3]: R_v = \frac{\sqrt{3\left(\xi\phi + \phi + 1 + \frac{1}{\xi}\right)}}{2} a = 2.1172a$$

$$[5]: R_v = \frac{\sqrt{\xi^2[(1067\phi + 1009) + \xi(2259\phi + 1168) + (941\phi + 1097)]}}{62} a = 2.2000a$$

$$R_l = \frac{\xi\sqrt{209[\xi^2(104\phi - 7) + \xi(153\phi + 52) + (195 - \phi)]}}{418} a = 2.0399a$$

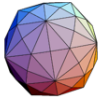

**Disdyakis Triacontahedron**

Vertices: 62 (30[4] + 20[6] + 12[10])  
 Faces: 120 (acute triangles)  
 Edges: 180 = 60L<sub>s</sub> + 60L<sub>lm</sub> + 60L<sub>l</sub>  
 Dual solid: Truncated Icosidodecahedron

$$V = \frac{180(5 + 4\sqrt{5})}{11} a^3 = 228.18a^3 \quad S = \frac{180}{11} \sqrt{179 - 24\sqrt{5}} a^2 = 183.20a^2$$

$$L_s = \frac{\sqrt{15(85 - 31\sqrt{5})}}{11} a = 1.3943a$$

$$[4]: R_v = \frac{3(5 + 4\sqrt{5})}{11} a = 3.8030a$$

$$[6]: R_v = \sqrt{15} a = 3.8730a$$

$$L_{lm} = \frac{3\sqrt{15(65 + 19\sqrt{5})}}{55} a = 2.1902a$$

$$[10]: R_v = \frac{3\sqrt{5(5 + 2\sqrt{5})}}{5} a = 4.1291a$$

$$L_l = \frac{2\sqrt{15(5 - \sqrt{5})}}{5} a = 2.5755a$$

$$R_e = \frac{\sqrt{6(5 + 2\sqrt{5})}}{2} a = 3.7694a$$

$$R_l = \frac{\sqrt{10845(39 + 16\sqrt{5})}}{241} a = 3.7366a$$

**Table S1.** Overview and summary of parameters from equations for polyhedra in Section 1 above.<sup>[S1]</sup>

| ↓ <b>Platonic and Archimedean Solids</b> ↓                                                               |       |       |        |            |            |        |            |            |            |            |            |  |
|----------------------------------------------------------------------------------------------------------|-------|-------|--------|------------|------------|--------|------------|------------|------------|------------|------------|--|
| <b>Polyhedron</b>                                                                                        | $V$   | $S$   | $R_c$  | $V_{Rc}/V$ | $S_{Rc}/S$ | $R_m$  | $V_{Rm}/V$ | $S_{Rm}/S$ | $R_i$      | $V_{Ri}/V$ | $S_{Ri}/S$ |  |
|  Icosahedron            | 2.182 | 8.66  | 0.9511 | 1.65       | 1.31       | 0.8090 | 1.02       | 0.95       | 0.7558     | 0.83       | 0.83       |  |
|  Dodecahedron           | 7.663 | 20.65 | 1.4010 | 1.50       | 1.19       | 1.3090 | 1.23       | 1.04       | 1.1140     | 0.76       | 0.76       |  |
|  Truncated Tetrahedron  | 2.711 | 12.12 | 1.1726 | 2.49       | 1.43       | 1.0606 | 1.84       | 1.17       | [3] 1.0206 | 1.64       | 1.08       |  |
|                                                                                                          |       |       |        |            |            |        |            |            | [6] 0.6123 | 0.35       | 0.39       |  |
|  Cuboctahedron          | 2.357 | 9.464 | 1.0000 | 1.78       | 1.33       | 0.8660 | 1.15       | 1.00       | [3] 0.8165 | 0.97       | 0.89       |  |
|                                                                                                          |       |       |        |            |            |        |            |            | [4] 0.7071 | 0.63       | 0.66       |  |
|  Truncated Octahedron | 11.31 | 26.78 | 1.5811 | 1.46       | 1.17       | 1.5000 | 1.25       | 1.06       | [4] 1.4142 | 1.05       | 0.94       |  |
|                                                                                                          |       |       |        |            |            |        |            |            | [6] 1.2247 | 0.68       | 0.70       |  |

|                                                                                     |                         |       |       |        |      |      |        |      |      |            |      |      |
|-------------------------------------------------------------------------------------|-------------------------|-------|-------|--------|------|------|--------|------|------|------------|------|------|
|    | Truncated Cube          | 13.56 | 32.43 | 1.7789 | 1.74 | 1.23 | 1.7071 | 1.54 | 1.13 | [3] 1.6825 | 1.47 | 1.10 |
|                                                                                     |                         |       |       |        |      |      |        |      |      | [8] 1.2071 | 0.54 | 0.56 |
|    | Rhombicuboctahedron     | 8.714 | 21.46 | 1.3990 | 1.32 | 1.15 | 1.3066 | 1.07 | 1.00 | [3] 1.2743 | 0.99 | 0.95 |
|                                                                                     |                         |       |       |        |      |      |        |      |      | [4] 1.2071 | 0.85 | 0.85 |
|    | Snub Cube               | 7.890 | 18.86 | 1.3437 | 1.29 | 1.20 | 1.2472 | 1.03 | 1.04 | [3] 1.2134 | 0.95 | 0.98 |
|                                                                                     |                         |       |       |        |      |      |        |      |      | [4] 1.1426 | 0.79 | 0.87 |
|    | Icosidodecahedron       | 13.84 | 29.31 | 1.6180 | 1.28 | 1.12 | 1.5388 | 1.10 | 1.02 | [3] 1.5115 | 1.05 | 0.98 |
|                                                                                     |                         |       |       |        |      |      |        |      |      | [5] 1.3764 | 0.79 | 0.81 |
|  | Truncated Cuboctahedron | 41.79 | 61.76 | 2.3176 | 1.25 | 1.09 | 2.2630 | 1.16 | 1.04 | [4] 2.2071 | 1.08 | 0.99 |
|                                                                                     |                         |       |       |        |      |      |        |      |      | [6] 2.0908 | 0.92 | 0.89 |
|                                                                                     |                         |       |       |        |      |      |        |      |      | [8] 1.9142 | 0.70 | 0.75 |

|                                                                                     |                             |       |        |        |      |      |        |      |      |             |      |      |
|-------------------------------------------------------------------------------------|-----------------------------|-------|--------|--------|------|------|--------|------|------|-------------|------|------|
|    | Truncated Icosahedron       | 55.29 | 72.61  | 2.4780 | 1.15 | 1.06 | 2.4271 | 1.08 | 1.02 | [5] 2.3274  | 0.96 | 0.94 |
|                                                                                     |                             |       |        |        |      |      |        |      |      | [6] 2.2672  | 0.88 | 0.89 |
|    | Truncated Dodecahedron      | 85.04 | 100.99 | 2.9695 | 1.29 | 1.10 | 2.9271 | 1.24 | 1.07 | [3] 2.9128  | 1.22 | 1.06 |
|                                                                                     |                             |       |        |        |      |      |        |      |      | [10] 2.4990 | 0.77 | 0.78 |
|                                                                                     |                             |       |        |        |      |      |        |      |      | [4] 2.1180  | 0.96 | 0.95 |
|    | Rhombicosidodecahedron      | 41.62 | 59.31  | 2.2330 | 1.12 | 1.06 | 2.1763 | 1.04 | 1.00 | [3] 2.1571  | 1.01 | 0.99 |
|                                                                                     |                             |       |        |        |      |      |        |      |      | [4] 2.1180  | 0.96 | 0.95 |
|                                                                                     |                             |       |        |        |      |      |        |      |      | [5] 2.0653  | 0.89 | 0.90 |
|   | Snub Dodecahedron           | 37.62 | 55.289 | 2.1558 | 1.12 | 1.06 | 2.0971 | 1.03 | 1.00 | [3] 2.0771  | 1.00 | 0.98 |
|                                                                                     |                             |       |        |        |      |      |        |      |      | [5] 1.9809  | 0.87 | 0.89 |
|  | Truncated Icosidodecahedron | 206.8 | 175.03 | 3.8024 | 1.11 | 1.04 | 3.7694 | 1.08 | 1.02 | [4] 3.7361  | 1.06 | 1.00 |
|                                                                                     |                             |       |        |        |      |      |        |      |      | [6] 3.6685  | 1.00 | 0.97 |

↓ Catalan Solids ↓

|                                                                                     |                            |        |       |            |      |      |        |      |      |        |      |      |
|-------------------------------------------------------------------------------------|----------------------------|--------|-------|------------|------|------|--------|------|------|--------|------|------|
|    | Triakis Tetrahedron        | 5.7276 | 17.91 | [3] 1.1023 | 0.98 | 0.85 | 1.0607 | 0.87 | 0.79 | 0.9594 | 0.65 | 0.65 |
|                                                                                     |                            |        |       | [6] 1.8371 | 4.53 | 2.37 |        |      |      |        |      |      |
|    | Rhombic Dodecahedron       | 2.3865 | 9.546 | [3] 0.9186 | 1.36 | 1.11 | 0.9428 | 1.47 | 1.17 | 0.7500 | 0.74 | 0.74 |
|                                                                                     |                            |        |       | [4] 1.0607 | 2.09 | 1.48 |        |      |      |        |      |      |
|    | Tetrakis Hexahedron        | 14.32  | 30.91 | [4] 1.5910 | 1.18 | 1.03 | 1.5000 | 0.99 | 0.91 | 1.4230 | 0.84 | 0.82 |
|                                                                                     |                            |        |       | [6] 1.8371 | 1.81 | 1.37 |        |      |      |        |      |      |
|   | Triakis Octahedron         | 23.31  | 42.69 | [3] 1.7321 | 0.93 | 0.88 | 1.7072 | 0.89 | 0.86 | 1.6383 | 0.79 | 0.79 |
|                                                                                     |                            |        |       | [8] 2.2414 | 2.02 | 1.48 |        |      |      |        |      |      |
|  | Deltoidal Icositetrahedron | 8.7507 | 21.51 | [3] 1.3397 | 1.15 | 1.05 | 1.3066 | 1.07 | 1.00 | 1.2203 | 0.87 | 0.87 |
|                                                                                     |                            |        |       | [4] 1.4142 | 1.35 | 1.17 |        |      |      |        |      |      |



|                                                                                     |                                |        |        |             |      |      |        |      |      |        |      |      |
|-------------------------------------------------------------------------------------|--------------------------------|--------|--------|-------------|------|------|--------|------|------|--------|------|------|
|    | Rhombic<br>Triacontahedron     | 14.80  | 30.34  | [3] 1.5667  | 1.09 | 1.02 | 1.5388 | 1.03 | 0.98 | 1.4635 | 0.89 | 0.89 |
|                                                                                     |                                |        |        | [5] 1.7204  | 1.44 | 1.23 |        |      |      |        |      |      |
|    | Pentagonal<br>Icositetrahedron | 7.4474 | 19.30  | [3] 1.2820  | 1.19 | 1.07 | 1.2472 | 1.09 | 1.01 | 1.1577 | 0.87 | 0.87 |
|                                                                                     |                                |        |        | [4] 1.3614  | 1.42 | 1.21 |        |      |      |        |      |      |
|    | Disdyakis<br>Dodecahedron      | 46.66  | 67.42  | [4] 2.3204  | 1.12 | 1.00 | 2.2630 | 1.04 | 0.95 | 2.2097 | 0.97 | 0.91 |
|                                                                                     |                                |        |        | [6] 2.4495  | 1.32 | 1.12 |        |      |      |        |      |      |
|                                                                                     |                                |        |        | [8] 2.6754  | 1.72 | 1.33 |        |      |      |        |      |      |
|   | Pentakis<br>Dodecahedron       | 59.88  | 75.56  | [5] 2.5309  | 1.13 | 1.07 | 2.4271 | 1.00 | 0.98 | 2.3771 | 0.94 | 0.94 |
|                                                                                     |                                |        |        | [6] 2.5981  | 1.23 | 1.12 |        |      |      |        |      |      |
|  | Triakis<br>Icosahedron         | 111.15 | 115.57 | [3] 2.9414  | 0.96 | 0.94 | 2.9271 | 0.95 | 0.93 | 2.8853 | 0.91 | 0.91 |
|                                                                                     |                                |        |        | [10] 3.4410 | 1.54 | 1.29 |        |      |      |        |      |      |

|                                                                                                                 |       |       |      |        |      |        |        |      |      |        |       |       |
|-----------------------------------------------------------------------------------------------------------------|-------|-------|------|--------|------|--------|--------|------|------|--------|-------|-------|
|  Deltoidal<br>Hexecontahedron  | 42.26 | 59.77 | [3]  | 2.1957 | 1.05 | 1.01   | 2.1763 | 1.02 | 1.00 | 2.1210 | 0.95  | 0.95  |
|                                                                                                                 |       |       | [4]  | 2.2361 | 1.11 | 1.05   |        |      |      |        |       |       |
|                                                                                                                 |       |       | [5]  | 2.2940 | 1.20 | 1.11   |        |      |      |        |       |       |
|  Pentagonal<br>Hexecontahedron | 37.59 | 55.28 | [3]  | 2.1172 | 1.06 | 1.02   | 2.0971 | 1.03 | 1.00 | 2.0399 | 0.95  | 0.95  |
|                                                                                                                 |       |       | [5]  | 2.2000 | 1.19 | 1.10   |        |      |      |        |       |       |
|  Disdyakis<br>Triacanthahedron | 7.20  | [4]   | 1.89 | 7.14   | 7.07 | 1548.4 | 91.1   | 92.0 | 89.6 | 87.2   | 1.010 | 0.983 |
|                                                                                                                 |       | [6]   | 1.86 | 7.01   | 6.95 | 1466.0 | 86.2   | 92.0 | 84.8 | 82.6   | 1.066 | 0.983 |
|                                                                                                                 |       | [10]  | 1.74 | 6.57   | 6.52 | 1209.8 | 71.2   | 92.0 | 70.0 | 68.2   | 1.292 | 0.983 |

## Section S2 – Data for polyhedra

**Table S2A.** Calculated numbers of gold atoms in various polyhedra assuming a radius of the circumscribed sphere of **10.08 Å** (*i.e.* a Au<sub>147</sub> cluster with regular icosahedral shape) and ratios between the number of gold atoms in the volume described by the circumscribed sphere (midscribed sphere or edge-scribed sphere) and the number of gold atoms obtained for each polyhedron

assuming a sphere with vertex radius  $N_c / N_v$ ,  $N_m / N_v$  or  $N_i / N_v$ .  $N_c$  is the number of gold atoms contained within the circumscribed sphere,  $N_v$  the number of gold atoms calculated from the volume of the polyhedron, and  $N_{ve}$  is the number of gold atoms calculated from the volume of the sphere with vertex radius in Catalan solids ( $N_{ve} = V_{Rv} / V_{Au}$ ),  $N_m$  is the number of gold atoms calculated from the volume of the sphere with midscribed radius ( $N_m = V_{Rm} / V_{Au}$ ), and  $N_e$  is the number of gold atoms calculated from the volume of the sphere with edge-scribed radius ( $N_{es} = V_{Re} / V_{Au}$ ).  $R_i$  = radius of the inscribed sphere,  $R_m$  = radius of the midscribed sphere,  $R_e$  = radius of the edge-scribed sphere,  $R_v$  = vertex radius (numbers in square brackets denote faces of polygons, e.g., [3] for triangle, [5] for pentagon, etc.),  $V$  is the calculated volume of the polyhedron,  $L$  is the edge length of the polyhedron,  $a$  is the edge length of dual solid in Catalan solids, and  $N_i$  is the number of gold atoms in the inscribed sphere. Models taken from: Polyèdres,

<http://wwwmathcurvecom/polyedres/polyedresshtml>

↓ Platonic and Archimedean Solids ↓

| Polyhedron                                                                                                | $R_c / \text{Å}$ | $L / \text{Å}$ | $R_m / \text{Å}$ | $R_i / \text{Å}$ | $V / \text{Å}^3$ | $N_v$ | $N_c$ | $N_m$ | $N_i$ | $N_c / N_v$ | $N_m / N_v$ | $N_i / N_v$ |
|-----------------------------------------------------------------------------------------------------------|------------------|----------------|------------------|------------------|------------------|-------|-------|-------|-------|-------------|-------------|-------------|
|  Icosahedron             | 10.08            | 10.60          | 8.57             | 8.01             | 2597.51          | 152.8 | 252.4 | 155.3 | 126.6 | 1.65        | 1.02        | 0.83        |
|  Dodecahedron           | 10.08            | 7.19           | 9.42             | 8.01             | 2852.25          | 167.8 | 252.4 | 205.7 | 126.6 | 1.50        | 1.23        | 0.75        |
|  Truncated Tetrahedron | 10.08            | 8.60           | 9.12             | [3] 8.77         | 1722.11          | 101.3 | 252.4 | 186.7 | 166.4 | 2.49        | 1.84        | 1.64        |
|                                                                                                           |                  |                |                  | [6] 5.26         |                  |       |       |       | 35.9  |             |             | 0.35        |
|  Cuboctahedron         | 10.08            | 10.08          | 8.73             | [3] 8.23         | 2414.02          | 142.0 | 252.4 | 163.9 | 137.4 | 1.78        | 1.15        | 0.97        |

|                                                                                     |                      |       |      |      |          |         |       |       |       |       |       |      |      |      |      |
|-------------------------------------------------------------------------------------|----------------------|-------|------|------|----------|---------|-------|-------|-------|-------|-------|------|------|------|------|
|    | Truncated Octahedron | 10.08 | 6.38 | 9.56 | [4] 7.13 | 2930.67 | 172.4 | 252.4 | 215.5 | 180.6 | 89.2  | 1.46 | 1.25 | 1.05 | 0.63 |
|    | Truncated Cube       | 10.08 | 5.67 | 9.67 | [6] 7.81 | 2467.10 | 145.1 | 252.4 | 223.0 | 213.5 | 117.3 | 1.74 | 1.54 | 1.47 | 0.68 |
|    | Rhombicuboctahedron  | 10.08 | 7.21 | 9.41 | [8] 6.84 | 3259.46 | 191.7 | 252.4 | 205.6 | 190.7 | 78.8  | 1.32 | 1.07 | 0.99 | 0.54 |
|   | Snub Cube            | 10.08 | 7.50 | 9.36 | [4] 8.70 | 3330.61 | 195.9 | 252.4 | 201.8 | 185.8 | 162.1 | 1.29 | 1.03 | 0.95 | 0.85 |
|  | Icosidodecahedron    | 10.08 | 6.23 | 9.59 | [3] 9.10 | 3346.43 | 196.8 | 252.4 | 217.1 | 205.7 | 155.2 | 1.28 | 1.10 | 1.05 | 0.79 |
|                                                                                     |                      |       |      |      | [4] 8.57 |         |       |       |       |       | 155.4 |      |      |      | 0.79 |

|                                                                                     |                             |       |      |      |           |         |       |       |       |       |      |      |       |      |
|-------------------------------------------------------------------------------------|-----------------------------|-------|------|------|-----------|---------|-------|-------|-------|-------|------|------|-------|------|
|    | Truncated<br>Cuboctahedron  | 10.08 | 4.35 | 9.84 | [4] 9.60  | 3438.26 | 202.3 | 252.4 | 234.9 | 218.0 | 1.25 | 1.16 | 1.08  |      |
|                                                                                     |                             |       |      |      | [6] 9.09  |         |       |       |       |       |      |      | 185.3 | 0.92 |
|                                                                                     |                             |       |      |      | [8] 8.33  |         |       |       |       |       |      |      | 142.2 | 0.70 |
|    | Truncated Icosahedron       | 10.08 | 4.07 | 9.87 | [5] 9.47  | 3721.55 | 218.9 | 252.4 | 237.1 | 209.1 | 1.15 | 1.08 | 0.96  |      |
|                                                                                     |                             |       |      |      | [6] 9.22  |         |       |       |       |       |      |      | 193.3 | 0.88 |
|    | Truncated<br>Dodecahedron   | 10.08 | 3.39 | 9.94 | [3] 9.89  | 3326.25 | 195.7 | 252.4 | 241.7 | 238.2 | 1.29 | 1.24 | 1.22  |      |
|                                                                                     |                             |       |      |      | [10] 8.48 |         |       |       |       |       |      |      | 150.4 | 0.77 |
|   | Rhombicosido-<br>decahedron | 10.08 | 4.51 | 9.82 | [3] 9.74  | 3828.40 | 225.2 | 252.4 | 233.6 | 227.5 | 1.12 | 1.04 | 1.01  |      |
|                                                                                     |                             |       |      |      | [4] 9.56  |         |       |       |       |       |      |      | 215.3 | 0.96 |
|                                                                                     |                             |       |      |      | [5] 9.32  |         |       |       |       |       |      |      | 199.7 | 0.89 |
|  | Snub Dodecahedron           | 10.08 | 4.68 | 9.81 | [3] 9.71  | 3845.70 | 226.2 | 252.4 | 232.3 | 225.7 | 1.12 | 1.03 | 1.00  |      |

|                                                                                   |                                |       |      |          |          |         |       |       |       |       |       |      |      |
|-----------------------------------------------------------------------------------|--------------------------------|-------|------|----------|----------|---------|-------|-------|-------|-------|-------|------|------|
|  | Truncated<br>Icosidodecahedron |       |      | [5] 9.26 |          |         |       |       |       | 195.8 |       |      | 0.87 |
|                                                                                   |                                | 10.08 | 2.65 | 9.99     | [4] 9.90 | 3852.64 | 226.6 | 252.4 | 245.8 | 239.4 | 1.11  | 1.08 | 1.06 |
|                                                                                   |                                |       |      |          | [6] 9.73 |         |       |       |       |       | 226.6 |      |      |

↓ Catalan Solids ↓

| Polyhedron                                                                          | $R_v / \text{Å}$ | $a / \text{Å}$ | $R_e / \text{Å}$ | $R_i / \text{Å}$ | $V / \text{Å}^3$ | $N_v$ | $N_{ve}$ | $N_e$ | $N_i$ | $N_{ve} / N_v$ | $N_{es} / N_v$ | $N_i / N_v$ |
|-------------------------------------------------------------------------------------|------------------|----------------|------------------|------------------|------------------|-------|----------|-------|-------|----------------|----------------|-------------|
|    | 10.80            | [3] 9.14       | 9.70             | 8.77             | 4379.81          | 257.6 | 252.4    | 224.9 | 166.4 | 0.980          | 0.873          | 0.646       |
|                                                                                     |                  | [6] 5.49       | 5.82             | 5.26             | 946.14           | 55.7  | 252.4    | 48.6  | 35.9  | 4.534          | 0.873          | 0.646       |
|    | 10.80            | [3] 10.97      | 10.35            | 8.23             | 3153.29          | 185.5 | 252.4    | 272.8 | 137.3 | 1.361          | 1.471          | 0.740       |
|                                                                                     |                  | [4] 9.50       | 8.96             | 7.13             | 2048.17          | 120.5 | 252.4    | 177.2 | 89.2  | 2.095          | 1.471          | 0.740       |
|  | 10.80            | [4] 6.34       | 9.50             | 9.02             | 3641.78          | 214.2 | 252.4    | 211.5 | 180.6 | 1.178          | 0.987          | 0.843       |
|                                                                                     |                  | [6] 5.49       | 8.23             | 7.81             | 2365.52          | 139.1 | 252.4    | 137.4 | 117.3 | 1.814          | 0.987          | 0.843       |

|                                                                                     |                             |       |     |      |      |      |         |       |       |       |       |       |       |       |
|-------------------------------------------------------------------------------------|-----------------------------|-------|-----|------|------|------|---------|-------|-------|-------|-------|-------|-------|-------|
|    | Triakis Octahedron          | 10.80 | [3] | 5.82 | 9.94 | 9.53 | 4594.15 | 270.2 | 252.4 | 241.6 | 213.5 | 0.934 | 0.894 | 0.790 |
|                                                                                     |                             |       | [8] | 4.50 | 7.68 | 7.37 | 2120.09 | 124.7 | 252.4 | 111.5 | 98.5  | 2.024 | 0.894 | 0.790 |
|    | Deltoidal Icositetrahedron  | 10.80 | [3] | 7.52 | 9.83 | 9.18 | 3727.36 | 219.3 | 252.4 | 234.1 | 190.7 | 1.151 | 1.068 | 0.870 |
|                                                                                     |                             |       | [4] | 7.13 | 9.31 | 8.70 | 3168.78 | 186.4 | 252.4 | 199.0 | 162.1 | 1.354 | 1.068 | 0.870 |
|    | Rhombic Triacontahedron     | 10.80 | [3] | 6.43 | 9.90 | 9.42 | 3941.72 | 231.9 | 252.4 | 239.1 | 205.7 | 1.088 | 1.031 | 0.887 |
|                                                                                     |                             |       | [5] | 5.86 | 9.02 | 8.57 | 2976.84 | 175.1 | 252.4 | 180.6 | 155.3 | 1.441 | 1.031 | 0.887 |
|    | Pentagonal Icositetrahedron | 10.80 | [3] | 7.86 | 9.81 | 9.10 | 3620.11 | 212.9 | 252.4 | 232.4 | 185.8 | 1.185 | 1.091 | 0.873 |
|                                                                                     |                             |       | [4] | 7.40 | 9.23 | 8.57 | 3022.94 | 177.8 | 252.4 | 194.0 | 155.2 | 1.419 | 1.091 | 0.873 |
|  | Disdyakis Dodecahedron      | 10.80 | [4] | 4.34 | 9.83 | 9.60 | 3825.37 | 225.0 | 252.4 | 234.1 | 217.9 | 1.121 | 1.040 | 0.969 |
|                                                                                     |                             |       | [6] | 4.12 | 9.31 | 9.09 | 3251.84 | 191.3 | 252.4 | 199.0 | 185.3 | 1.319 | 1.040 | 0.969 |
|                                                                                     |                             |       | [8] | 3.77 | 8.53 | 8.33 | 2495.72 | 146.8 | 252.4 | 152.7 | 142.2 | 1.719 | 1.040 | 0.969 |

|                                                                                     |                               |       |      |      |       |      |         |       |       |       |       |       |       |       |
|-------------------------------------------------------------------------------------|-------------------------------|-------|------|------|-------|------|---------|-------|-------|-------|-------|-------|-------|-------|
|    | Pentakis<br>Dodecahedron      | 10.80 | [5]  | 3.98 | 9.67  | 9.47 | 3783.02 | 222.5 | 252.4 | 222.6 | 209.1 | 1.134 | 1.000 | 0.940 |
|                                                                                     |                               |       | [6]  | 3.88 | 9.42  | 9.22 | 3497.00 | 205.7 | 252.4 | 205.7 | 193.3 | 1.227 | 1.000 | 0.940 |
|    | Triakis Icosahedron           | 10.80 | [3]  | 3.43 | 10.03 | 9.89 | 4473.31 | 263.1 | 252.4 | 248.7 | 238.2 | 0.959 | 0.945 | 0.905 |
|                                                                                     |                               |       | [10] | 2.93 | 8.57  | 8.45 | 2794.07 | 164.4 | 252.4 | 155.3 | 148.8 | 1.535 | 0.945 | 0.905 |
|    | Deltoidal<br>Hexecontahedron  | 10.80 | [3]  | 4.59 | 9.99  | 9.74 | 4088.76 | 240.5 | 252.4 | 245.7 | 227.5 | 1.049 | 1.022 | 0.946 |
|                                                                                     |                               |       | [4]  | 4.51 | 9.81  | 9.56 | 3871.13 | 227.7 | 252.4 | 232.7 | 215.4 | 1.108 | 1.022 | 0.946 |
|                                                                                     |                               |       | [5]  | 4.39 | 9.56  | 9.32 | 3585.34 | 210.9 | 252.4 | 215.5 | 199.5 | 1.197 | 1.022 | 0.946 |
|   | Pentagonal<br>Hexecontahedron | 10.80 | [3]  | 4.76 | 9.98  | 9.71 | 4056.66 | 238.6 | 252.4 | 245.2 | 225.7 | 1.058 | 1.028 | 0.946 |
|                                                                                     |                               |       | [5]  | 4.58 | 9.61  | 9.35 | 3615.65 | 212.7 | 252.4 | 218.6 | 201.2 | 1.187 | 1.028 | 0.946 |
|  | Disdyakis<br>Triacontahedron  | 10.80 | [4]  | 2.65 | 9.99  | 9.90 | 4248.94 | 249.9 | 252.4 | 245.7 | 239.4 | 1.010 | 0.983 | 0.958 |
|                                                                                     |                               |       | [6]  | 2.60 | 9.81  | 9.73 | 4022.69 | 236.6 | 252.4 | 232.6 | 226.6 | 1.066 | 0.983 | 0.958 |



|      |      |      |      |         |       |       |       |       |       |       |       |
|------|------|------|------|---------|-------|-------|-------|-------|-------|-------|-------|
| [10] | 2.44 | 9.20 | 9.12 | 3319.66 | 195.3 | 252.4 | 192.0 | 187.0 | 1.292 | 0.983 | 0.958 |
|------|------|------|------|---------|-------|-------|-------|-------|-------|-------|-------|

**Table S2B.** Calculated numbers of gold atoms in various polyhedra assuming a radius of the circumscribed sphere of **7.20 Å** (*i.e.* a Au<sub>55</sub> cluster with regular icosahedral shape) and ratios between the number of gold atoms in the volume described by the circumscribed sphere (midscribed sphere or edge-scribed sphere) and the number of gold atoms obtained for each polyhedron assuming a sphere with vertex radius  $N_c / N_v$ ,  $N_m / N_v$  or  $N_i / N_v$ .  $N_c$  is the number of gold atoms contained within the circumscribed sphere,  $N_v$  the number of gold atoms calculated from the volume of the polyhedron, and  $N_{ve}$  is the number of gold atoms calculated from the volume of the sphere with vertex radius in Catalan solids ( $N_{ve} = V_{Rv} / V_{Au}$ ),  $N_m$  is the number of gold atoms calculated from the volume of the sphere with midscribed radius ( $N_m = V_{Rm} / V_{Au}$ ), and  $N_e$  is the number of gold atoms calculated from the volume of the sphere with edge-scribed radius ( $N_e = V_{Re} / V_{Au}$ ).  $R_i$  = radius of the inscribed sphere,  $R_m$  = radius of the midscribed sphere,  $R_e$  = radius of the edge-scribed sphere,  $R_v$  = vertex radius (numbers in square brackets denote faces of polygons, *e.g.*, [3] for triangle, [5] for pentagon, etc.),  $V$  is the calculated volume of the polyhedron,  $L$  is the edge length of the polyhedron,  $a$  is the edge length of dual solid in Catalan solids, and  $N_i$  is the number of gold atoms in the inscribed sphere.<sup>[S1]</sup>

↓ **Platonic and Archimedean Solids** ↓

| Polyhedron                                                                                       | $R_c / \text{Å}$ | $L / \text{Å}$ | $R_m / \text{Å}$ | $R_i / \text{Å}$ | $V / \text{Å}^3$ | $N_v$ | $N_c$ | $N_m$ | $N_i$ | $N_c / N_v$ | $N_m / N_v$ | $N_i / N_v$ |
|--------------------------------------------------------------------------------------------------|------------------|----------------|------------------|------------------|------------------|-------|-------|-------|-------|-------------|-------------|-------------|
|  Icosahedron  | 7.20             | 7.57           | 6.12             | 5.72             | 946.62           | 55.7  | 92.0  | 56.6  | 46.2  | 1.652       | 1.016       | 0.829       |
|  Dodecahedron | 7.20             | 5.14           | 6.73             | 5.72             | 1039.45          | 61.1  | 92.0  | 75.0  | 46.1  | 1.504       | 1.226       | 0.755       |

|                                                                                     |                       |      |      |      |          |         |      |      |      |      |       |       |       |
|-------------------------------------------------------------------------------------|-----------------------|------|------|------|----------|---------|------|------|------|------|-------|-------|-------|
|    | Truncated Tetrahedron | 7.20 | 6.14 | 6.51 | [3] 6.27 | 627.59  | 36.9 | 92.0 | 68.1 | 60.6 | 2.491 | 1.843 | 1.643 |
|                                                                                     |                       |      |      |      | [6] 3.76 |         |      |      |      | 13.1 |       |       | 0.355 |
|    | Cuboctahedron         | 7.20 | 7.20 | 6.24 | [3] 5.88 | 879.75  | 51.7 | 92.0 | 59.7 | 50.1 | 1.777 | 1.154 | 0.967 |
|                                                                                     |                       |      |      |      | [4] 5.09 |         |      |      |      | 32.5 |       |       | 0.628 |
|    | Truncated Octahedron  | 7.20 | 4.55 | 6.83 | [4] 6.44 | 1068.03 | 62.8 | 92.0 | 78.5 | 65.8 | 1.464 | 1.250 | 1.048 |
|                                                                                     |                       |      |      |      | [6] 5.58 |         |      |      |      | 42.7 |       |       | 0.680 |
|    | Truncated Cube        | 7.20 | 4.05 | 6.91 | [3] 6.81 | 899.09  | 52.9 | 92.0 | 81.3 | 77.8 | 1.739 | 1.537 | 1.471 |
|                                                                                     |                       |      |      |      | [8] 4.89 |         |      |      |      | 28.7 |       |       | 0.543 |
|  | Rhombicuboctahedron   | 7.20 | 5.15 | 6.72 | [3] 6.56 | 1187.85 | 69.9 | 92.0 | 74.9 | 69.5 | 1.316 | 1.072 | 0.995 |
|                                                                                     |                       |      |      |      | [4] 6.21 |         |      |      |      | 59.1 |       |       | 0.845 |
|  | Snub Cube             | 7.20 | 5.36 | 6.68 | [3] 6.50 | 1213.78 | 71.4 | 92.0 | 73.5 | 67.7 | 1.288 | 1.030 | 0.949 |

|                                                                                     |                             |      |      |      |           |         |      |      |      |      |      |       |       |       |       |
|-------------------------------------------------------------------------------------|-----------------------------|------|------|------|-----------|---------|------|------|------|------|------|-------|-------|-------|-------|
|    | Icosidodecahedron           | 7.20 | 4.45 | 6.85 | [4] 6.12  | 1219.55 | 71.7 | 92.0 | 79.1 | 75.0 | 56.5 | 1.282 | 1.103 | 1.045 | 0.792 |
|    | Truncated<br>Cuboctahedron  | 7.20 | 4.35 | 7.03 | [5] 6.12  | 1253.01 | 73.7 | 92.0 | 85.6 | 79.4 | 56.6 | 1.248 | 1.162 | 1.078 | 0.789 |
|    | Truncated Icosahedron       | 7.20 | 4.07 | 7.05 | [6] 6.50  | 1356.25 | 79.8 | 92.0 | 86.4 | 76.2 | 67.5 | 1.153 | 1.083 | 0.955 | 0.916 |
|  | Truncated<br>Dodecahedron   | 7.20 | 3.39 | 7.10 | [8] 5.95  | 1212.19 | 71.3 | 92.0 | 88.1 | 86.8 | 51.8 | 1.290 | 1.235 | 1.217 | 0.703 |
|  | Rhombicosido-<br>decahedron | 7.20 | 4.51 | 7.02 | [6] 6.59  | 1395.19 | 82.1 | 92.0 | 85.1 | 82.9 | 70.4 | 1.121 | 1.037 | 1.010 | 0.883 |
|                                                                                     |                             |      |      |      | [3] 7.06  |         |      |      |      |      | 54.8 |       |       |       | 0.769 |
|                                                                                     |                             |      |      |      | [10] 6.06 |         |      |      |      |      |      |       |       |       |       |

|                                                                                   |                             |      |      |          |          |         |      |      |      |      |       |       |       |
|-----------------------------------------------------------------------------------|-----------------------------|------|------|----------|----------|---------|------|------|------|------|-------|-------|-------|
|                                                                                   |                             |      |      | [4] 6.83 |          |         |      |      |      | 78.5 |       |       | 0.956 |
|                                                                                   |                             |      |      | [5] 6.66 |          |         |      |      |      | 72.8 |       |       | 0.887 |
|  | Snub Dodecahedron           | 7.20 | 4.68 | 7.00     | [3] 6.94 | 1401.49 | 82.4 | 92.0 | 84.7 | 82.3 | 1.116 | 1.027 | 0.998 |
|                                                                                   |                             |      |      | [5] 6.62 |          |         |      |      |      | 71.4 |       |       | 0.865 |
|  | Truncated Icosidodecahedron | 7.20 | 2.65 | 7.14     | [4] 7.07 | 1404.02 | 82.6 | 92.0 | 89.6 | 87.2 | 1.114 | 1.085 | 1.056 |
|                                                                                   |                             |      |      | [6] 6.95 |          |         |      |      |      | 82.6 |       |       | 1.000 |

↓ Catalan Solids ↓

| Polyhedron                                                                          | $R_v / \text{Å}$ | $a / \text{Å}$ | $R_e / \text{Å}$ | $R_i / \text{Å}$ | $V / \text{Å}^3$ | $N_v$ | $N_{ve}$ | $N_e$ | $N_i$ | $N_{ve} / N_v$ | $N_{es} / N_v$ | $N_i / N_v$ |
|-------------------------------------------------------------------------------------|------------------|----------------|------------------|------------------|------------------|-------|----------|-------|-------|----------------|----------------|-------------|
|  | 7.20             | [3] 6.53       | 6.93             | 6.27             | 1596.1           | 93.9  | 92.0     | 81.9  | 60.6  | 0.980          | 0.873          | 0.646       |
|                                                                                     |                  | [6] 3.92       | 4.16             | 3.76             | 344.8            | 20.3  | 92.0     | 17.7  | 13.1  | 4.534          | 0.873          | 0.646       |
|  | 7.20             | [3] 7.84       | 7.39             | 5.88             | 1149.2           | 67.6  | 92.0     | 99.4  | 50.1  | 1.361          | 1.471          | 0.740       |

|                                                                                     |                             |      |          |      |      |        |      |      |      |      |       |       |       |
|-------------------------------------------------------------------------------------|-----------------------------|------|----------|------|------|--------|------|------|------|------|-------|-------|-------|
|    | Tetrakis Hexahedron         | 7.20 | [4] 6.79 | 6.40 | 5.09 | 746.4  | 43.9 | 92.0 | 64.6 | 32.5 | 2.095 | 1.471 | 0.740 |
|    | Triakis Octahedron          | 7.20 | [3] 4.16 | 7.10 | 6.81 | 1674.3 | 98.5 | 92.0 | 88.1 | 77.8 | 0.934 | 0.894 | 0.790 |
|    | Deltoidal Icositetrahedron  | 7.20 | [3] 5.37 | 7.02 | 6.56 | 1358.4 | 79.9 | 92.0 | 85.3 | 69.5 | 1.151 | 1.068 | 0.870 |
|   | Rhombic Triacontahedron     | 7.20 | [3] 4.60 | 7.07 | 6.73 | 1436.5 | 84.5 | 92.0 | 87.1 | 75.0 | 1.088 | 1.031 | 0.887 |
|  | Pentagonal Icositetrahedron | 7.20 | [3] 5.62 | 7.00 | 6.50 | 1319.3 | 77.6 | 92.0 | 84.7 | 67.7 | 1.185 | 1.091 | 0.873 |
|                                                                                     |                             |      | [4] 5.29 | 6.60 | 6.12 | 1101.7 | 64.8 | 92.0 | 70.7 | 56.6 | 1.419 | 1.091 | 0.873 |

|                                                                                                                   |      |      |      |      |      |        |      |      |      |      |       |       |       |
|-------------------------------------------------------------------------------------------------------------------|------|------|------|------|------|--------|------|------|------|------|-------|-------|-------|
|  Disdyakis<br>Dodecahedron       | 7.20 | [4]  | 3.10 | 7.02 | 6.86 | 1394.1 | 82.0 | 92.0 | 85.3 | 79.4 | 1.121 | 1.040 | 0.969 |
|                                                                                                                   |      | [6]  | 2.94 | 6.65 | 6.50 | 1185.1 | 69.7 | 92.0 | 72.5 | 67.5 | 1.319 | 1.040 | 0.969 |
|                                                                                                                   |      | [8]  | 2.69 | 6.09 | 5.95 | 909.5  | 53.5 | 92.0 | 55.7 | 51.8 | 1.719 | 1.040 | 0.969 |
|  Pentakis<br>Dodecahedron        | 7.20 | [5]  | 2.84 | 6.90 | 6.76 | 1378.7 | 81.1 | 92.0 | 81.1 | 76.2 | 1.134 | 1.000 | 0.940 |
|                                                                                                                   |      | [6]  | 2.77 | 6.73 | 6.59 | 1274.4 | 75.0 | 92.0 | 75.0 | 70.4 | 1.227 | 1.000 | 0.940 |
|  Triakis Icosahedron             | 7.20 | [3]  | 2.45 | 7.16 | 7.06 | 1630.2 | 95.9 | 92.0 | 90.6 | 86.8 | 0.959 | 0.945 | 0.905 |
|                                                                                                                   |      | [10] | 2.09 | 6.12 | 6.04 | 1018.2 | 59.9 | 92.0 | 56.6 | 54.2 | 1.535 | 0.945 | 0.905 |
|  Deltoidal<br>Hexecontahedron   | 7.20 | [3]  | 3.28 | 7.14 | 6.96 | 1490.1 | 87.7 | 92.0 | 89.6 | 82.9 | 1.049 | 1.022 | 0.946 |
|                                                                                                                   |      | [4]  | 3.22 | 7.01 | 6.83 | 1410.8 | 83.0 | 92.0 | 84.8 | 78.5 | 1.108 | 1.022 | 0.946 |
|                                                                                                                   |      | [5]  | 3.14 | 6.83 | 6.66 | 1306.6 | 76.9 | 92.0 | 78.5 | 72.7 | 1.197 | 1.022 | 0.946 |
|  Pentagonal<br>Hexecontahedron | 7.20 | [3]  | 3.40 | 7.13 | 6.94 | 1478.4 | 87.0 | 92.0 | 89.4 | 82.3 | 1.058 | 1.028 | 0.946 |

|                                                                                                                |      |           |      |      |        |      |      |      |      |       |       |       |
|----------------------------------------------------------------------------------------------------------------|------|-----------|------|------|--------|------|------|------|------|-------|-------|-------|
|  Disdyakis<br>Triacontahedron |      | [5] 3.27  | 6.86 | 6.68 | 1317.7 | 77.5 | 92.0 | 79.7 | 73.3 | 1.187 | 1.028 | 0.946 |
|                                                                                                                | 7.20 | [4] 1.89  | 7.14 | 7.07 | 1548.4 | 91.1 | 92.0 | 89.6 | 87.2 | 1.010 | 0.983 | 0.958 |
|                                                                                                                |      | [6] 1.86  | 7.01 | 6.95 | 1466.0 | 86.2 | 92.0 | 84.8 | 82.6 | 1.066 | 0.983 | 0.958 |
|                                                                                                                |      | [10] 1.74 | 6.57 | 6.52 | 1209.8 | 71.2 | 92.0 | 70.0 | 68.2 | 1.292 | 0.983 | 0.958 |

### Section S3 – Data for Archimedean Icosahedra

**Table S3.** List of Archimedean icosahedron clusters (for abbreviations see Table 4 in the main text).

| Polyhedron           | $G$ | Cluster | Surface | $D_c / \text{nm}$ | $D_m / \text{nm}$ | $D_i / \text{nm}$ | $N_v$ | $N_c$ | $N_m$ | $N_i$ | $N_v/N$ | $N_c/N$ | $N_m/N$ | $N_i/N$ |
|----------------------|-----|---------|---------|-------------------|-------------------|-------------------|-------|-------|-------|-------|---------|---------|---------|---------|
| Icosahedron 13       | 1   | 13      | 12      | 0.864             | 0.735             | 0.687             | 12.0  | 19.9  | 12.2  | 10.0  | 0.93    | 1.53    | 0.94    | 0.77    |
| Dodecahedron 33      | 2   | 33      | 20      | 1.203             | 1.124             | 0.956             | 35.7  | 53.7  | 43.8  | 26.9  | 1.08    | 1.63    | 1.33    | 0.82    |
| Icosidodecahedron 43 | 2   | 43      | 30      | 1.268             | 1.206             | [3] 1.184         | 49.0  | 62.8  | 54.0  | 51.2  | 1.14    | 1.46    | 1.26    | 1.19    |
|                      |     |         |         |                   |                   | [4] 1.079         |       |       |       |       |         |         |         |         |
| Icosahedron 55       | 2   | 55      | 42      | 1.440             | 1.225             | 1.144             | 55.7  | 92.0  | 56.6  | 46.2  | 1.01    | 1.67    | 1.03    | 0.84    |
| Dodecahedron 75      | 3   | 75      | 32      | 1.680             | 1.570             | 1.335             | 97.1  | 146.1 | 119.1 | 73.3  | 1.30    | 1.95    | 1.59    | 0.98    |
| Rhombicosido-        | 3   | 115     | 60      | 1.717             | 1.674             | [3] 1.659         | 139.2 | 156.0 | 144.4 | 140.6 | 1.21    | 1.36    | 1.26    | 1.22    |

|                                 |   |     |     |       |       |            |       |       |       |       |      |      |      |      |
|---------------------------------|---|-----|-----|-------|-------|------------|-------|-------|-------|-------|------|------|------|------|
| decahedron 115                  |   |     |     |       |       | [4] 1.629  |       |       |       | 133.1 |      |      |      | 1.16 |
|                                 |   |     |     |       |       | [5] 1.588  |       |       |       | 123.4 |      |      |      | 1.07 |
| Truncated<br>Icosahedron 135    | 3 | 135 | 80  | 1.758 | 1.722 | [5] 1.651  | 145.1 | 167.3 | 157.2 | 138.6 | 1.07 | 1.24 | 1.16 | 1.03 |
|                                 |   |     |     |       |       | [6] 1.608  |       |       |       | 128.1 |      |      |      | 0.95 |
| Icosidodecahedron<br>145        | 3 | 145 | 90  | 1.867 | 1.776 | [3] 1.744  | 156.4 | 200.5 | 172.5 | 163.5 | 1.08 | 1.38 | 1.19 | 1.13 |
|                                 |   |     |     |       |       | [5] 1.588  |       |       |       | 123.4 |      |      |      | 0.85 |
| Icosahedron 147                 | 3 | 147 | 92  | 2.016 | 1.715 | 1.602      | 152.8 | 252.4 | 155.3 | 126.6 | 1.04 | 1.72 | 1.06 | 0.86 |
| Dodecahedron 165                | 3 | 165 | 110 | 2.175 | 2.031 | 1.728      | 210.6 | 316.7 | 258.2 | 158.9 | 1.28 | 1.92 | 1.56 | 0.96 |
| Truncated<br>Dodecahedron 195   | 4 | 195 | 140 | 2.119 | 2.089 | [3] 2.078  | 227.2 | 293.0 | 280.6 | 276.5 | 1.17 | 1.50 | 1.44 | 1.42 |
|                                 |   |     |     |       |       | [10] 1.783 |       |       |       | 174.6 |      |      |      | 0.90 |
| Rhombicosido-<br>decahedron 207 | 4 | 207 | 72  | 2.119 | 2.065 | [3] 2.047  | 261.5 | 293.0 | 271.2 | 264.1 | 1.26 | 1.42 | 1.31 | 1.28 |
|                                 |   |     |     |       |       | [4] 2.010  |       |       |       | 250.0 |      |      |      | 1.21 |
|                                 |   |     |     |       |       | [5] 1.960  |       |       |       | 231.8 |      |      |      | 1.12 |
| Icosidodecahedron<br>237        | 4 | 237 | 102 | 2.268 | 2.157 | [3] 2.119  | 280.3 | 359.4 | 309.2 | 293.0 | 1.18 | 1.52 | 1.30 | 1.24 |
|                                 |   |     |     |       |       | [5] 1.930  |       |       |       | 221.3 |      |      |      | 0.93 |
| Sub-Rhombicosi-                 | 4 | 267 | 120 | 2.182 | 2.126 | [3] 2.107  | 285.4 | 319.8 | 296.0 | 288.3 | 1.07 | 1.20 | 1.11 | 1.08 |



|                                        |   |     |     |       |       |            |       |       |       |       |       |      |      |      |      |
|----------------------------------------|---|-----|-----|-------|-------|------------|-------|-------|-------|-------|-------|------|------|------|------|
| dodecahedron 267                       |   |     |     |       |       | [4] 2.069  |       |       |       |       | 272.9 |      |      |      | 1.02 |
|                                        |   |     |     |       |       | [5] 2.018  |       |       |       |       | 253.0 |      |      |      | 0.95 |
| Icosahedron 309                        | 4 | 309 | 162 | 2.592 | 2.205 | 2.060      | 324.7 | 536.4 | 330.1 | 269.2 | 1.05  | 1.74 | 1.07 | 1.01 |      |
| Sub-Truncated<br>Icosahedron 327       | 4 | 327 | 180 | 2.453 | 2.403 | [5] 2.304  | 394.4 | 454.7 | 427.2 | 376.7 | 1.21  | 1.39 | 1.31 | 1.15 |      |
|                                        |   |     |     |       |       | [6] 2.244  |       |       |       |       | 348.2 |      |      |      | 1.06 |
| <hr/>                                  |   |     |     |       |       |            |       |       |       |       |       |      |      |      |      |
| Truncated<br>Dodecahedron 357          | 5 | 357 | 120 | 2.627 | 2.589 | [3] 2.577  | 432.8 | 558.2 | 534.7 | 526.9 | 1.21  | 1.56 | 1.50 | 1.48 |      |
|                                        |   |     |     |       |       | [10] 2.211 |       |       |       |       | 332.7 |      |      |      | 0.93 |
| Sub-Rhombico-<br>sidodecahedron<br>387 | 5 | 387 | 120 | 2.493 | 2.430 | [3] 2.409  | 426.0 | 477.4 | 441.9 | 430.3 | 1.10  | 1.23 | 1.14 | 1.11 |      |
|                                        |   |     |     |       |       | [4] 2.365  |       |       |       |       | 407.3 |      |      |      | 1.05 |
|                                        |   |     |     |       |       | [5] 2.306  |       |       |       |       | 377.7 |      |      |      | 0.98 |
| Truncated<br>Dodecahedron 447          | 5 | 417 | 180 | 2.738 | 2.699 | [3] 2.686  | 490.0 | 632.0 | 605.4 | 596.5 | 1.18  | 1.52 | 1.45 | 1.43 |      |
|                                        |   |     |     |       |       | [10] 2.304 |       |       |       |       | 376.7 |      |      |      | 0.90 |
| Sub-Rhombico-<br>sidodecahedron<br>429 | 5 | 429 | 132 | 2.667 | 2.600 | [3] 2.577  | 521.6 | 584.5 | 541.1 | 526.9 | 1.22  | 1.36 | 1.26 | 1.23 |      |
|                                        |   |     |     |       |       | [4] 2.530  |       |       |       |       | 498.7 |      |      |      | 1.16 |

|                                          |   |     |     |       |       |            |       |       |       |       |       |      |      |      |      |
|------------------------------------------|---|-----|-----|-------|-------|------------|-------|-------|-------|-------|-------|------|------|------|------|
| Truncated Icosido-<br>decahedron 437     | 5 | 437 | 140 | 2.671 | 2.647 | [5] 2.467  | 526.9 | 586.7 | 571.5 | 556.5 | 462.4 | 1.21 | 1.34 | 1.31 | 1.27 |
|                                          |   |     |     |       |       | [4] 2.624  |       |       |       |       |       |      |      |      |      |
|                                          |   |     |     |       |       | [6] 2.577  |       |       |       |       | 526.9 |      |      |      | 1.21 |
|                                          |   |     |     |       |       | [12] 2.417 |       |       |       |       | 434.8 |      |      |      | 0.99 |
| Dodecahedron 467                         | 5 | 437 | 210 | 3.086 | 2.883 | 2.452      | 602.0 | 905.4 | 738.0 | 454.3 |       | 1.38 | 2.07 | 1.69 | 1.04 |
| Sub-Truncated<br>Icosahedron 489         | 5 | 489 | 192 | 2.738 | 2.681 | [5] 2.571  | 548.2 | 632.0 | 593.8 | 523.6 |       | 1.12 | 1.29 | 1.21 | 1.07 |
|                                          |   |     |     |       |       | [6] 2.505  |       |       |       |       | 484.0 |      |      |      | 0.99 |
| Sub-Icosahedron<br>509                   | 5 | 509 | 200 | 3.028 | 2.576 | 2.407      | 517.9 | 855.4 | 526.4 | 429.3 |       | 1.02 | 1.68 | 1.03 | 0.84 |
| Icosahedron 561                          | 5 | 561 | 252 | 3.168 | 2.695 | 2.517      | 592.9 | 979.3 | 602.7 | 491.4 |       | 1.06 | 1.75 | 1.07 | 0.88 |
| Sub-Truncated<br>Icosahedron 599         | 5 | 599 | 290 | 2.918 | 2.858 | [5] 2.740  | 663.6 | 765.0 | 718.9 | 633.9 |       | 1.11 | 1.28 | 1.20 | 1.06 |
|                                          |   |     |     |       |       | [6] 2.670  |       |       |       |       | 585.9 |      |      |      | 0.98 |
| Snub<br>Dodecahedron<br>(enantiomer) 629 | 6 | 629 | 200 | 3.149 | 3.064 | [3] 3.034  | 862.5 | 962.2 | 885.7 | 860.6 |       | 1.37 | 1.53 | 1.41 | 1.37 |
|                                          |   |     |     |       |       | [5] 2.894  |       |       |       |       | 746.5 |      |      |      | 1.19 |

|                                           |   |      |     |       |       |            |       |       |       |       |      |      |      |      |
|-------------------------------------------|---|------|-----|-------|-------|------------|-------|-------|-------|-------|------|------|------|------|
| Truncated<br>Dodecahedron 669             | 6 | 669  | 240 | 3.093 | 3.049 | [3] 3.034  | 706.9 | 911.7 | 873.2 | 860.5 | 1.06 | 1.36 | 1.31 | 1.29 |
|                                           |   |      |     |       |       | [10] 2.603 |       |       |       | 543.4 |      |      |      | 0.81 |
| Truncated Icosido-<br>dodecahedron 689    | 6 | 689  | 260 | 3.064 | 3.037 | [4] 3.010  | 795.3 | 885.6 | 862.7 | 840.1 | 1.15 | 1.29 | 1.25 | 1.22 |
|                                           |   |      |     |       |       | [6] 2.956  |       |       |       | 795.3 |      |      |      | 1.15 |
|                                           |   |      |     |       |       | [12] 2.772 |       |       |       | 656.3 |      |      |      | 0.95 |
| Rhombicosido-<br>dodecahedron 789         | 6 | 789  | 360 | 3.114 | 3.035 | [3] 3.008  | 829.8 | 929.9 | 860.9 | 838.3 | 1.05 | 1.18 | 1.09 | 1.06 |
|                                           |   |      |     |       |       | [4] 2.953  |       |       |       | 793.5 |      |      |      | 1.01 |
|                                           |   |      |     |       |       | [5] 2.880  |       |       |       | 735.7 |      |      |      | 0.93 |
| Sub-Truncated<br>Icosidodecahedron<br>839 | 6 | 839  | 402 | 3.182 | 3.155 | [4] 3.127  | 891.5 | 992.8 | 967.1 | 941.7 | 1.06 | 1.18 | 1.15 | 1.12 |
|                                           |   |      |     |       |       | [6] 3.070  |       |       |       | 891.5 |      |      |      | 1.06 |
|                                           |   |      |     |       |       | [12] 2.880 |       |       |       | 735.7 |      |      |      | 0.88 |
| Truncated<br>Icosahedron 851              | 6 | 851  | 302 | 3.228 | 3.161 | [5] 3.031  | 898.4 | 1034  | 973.1 | 858.1 | 1.06 | 1.22 | 1.14 | 1.01 |
|                                           |   |      |     |       |       | [6] 2.953  |       |       |       | 793.2 |      |      |      | 0.93 |
| Icosahedron 923                           | 6 | 923  | 362 | 3.744 | 3.185 | 2.975      | 978.7 | 1616  | 994.8 | 811.1 | 1.06 | 1.75 | 1.08 | 0.88 |
| Dodecahedron<br>1019                      | 6 | 1019 | 570 | 4.349 | 4.063 | 3.456      | 1685  | 2534  | 2066  | 1271  | 1.65 | 2.49 | 2.03 | 1.38 |

## Section S4 – Data for Archimedean Cubes

**Table S4.** List of Archimedean cubes (for abbreviations see Table 5 in the main text).

| Polyhedron                  | $G$ | Cluster | Surface | $D_c / \text{nm}$ | $D_m / \text{nm}$ | $D_i / \text{nm}$      | $N_v$ | $N_c$ | $N_m$ | $N_i$          | $N_v/N$ | $N_c/N$ | $N_m/N$ | $N_i/N$      |
|-----------------------------|-----|---------|---------|-------------------|-------------------|------------------------|-------|-------|-------|----------------|---------|---------|---------|--------------|
| Cuboctahedron 13            | 1   | 13      | 12      | 0.983             | 0.852             | [3] 0.803<br>[4] 0.695 | 16.5  | 29.3  | 19.0  | 15.9<br>10.4   | 1.27    | 2.25    | 1.46    | 1.23<br>0.80 |
| Truncated Octahedron 38     | 2   | 38      | 32      | 1.233             | 1.169             | [4] 1.103<br>[6] 0.955 | 39.4  | 57.7  | 49.3  | 41.3<br>26.8   | 1.04    | 1.52    | 1.30    | 1.09<br>0.71 |
| Rhombicuboctahedron 43      | 2   | 43      | 30      | 1.278             | 1.193             | [3] 1.164<br>[4] 1.103 | 48.8  | 64.3  | 52.4  | 48.6<br>41.3   | 1.14    | 1.49    | 1.22    | 1.13<br>0.96 |
| Cuboctahedron 55            | 2   | 55      | 42      | 1.559             | 1.350             | [3] 1.273<br>[4] 1.103 | 65.7  | 116.8 | 75.8  | 63.6<br>41.3   | 1.19    | 2.12    | 1.38    | 1.16<br>0.75 |
| Truncated Cube 62           | 2   | 62      | 48      | 1.625             | 1.559             | [3] 1.537<br>[8] 1.103 | 76.0  | 132.1 | 116.8 | 111.8<br>41.3  | 1.23    | 2.13    | 1.88    | 1.80<br>0.67 |
| Sub-Truncated Octahedron 79 | 3   | 79      | 60      | 1.688             | 1.601             | [4] 1.510<br>[6] 1.308 | 101.2 | 148.2 | 126.5 | 106.0<br>68.9  | 1.28    | 1.88    | 1.60    | 1.34<br>0.87 |
| Sub-Rhombicuboctahedron 92  | 3   | 92      | 54      | 1.750             | 1.634             | [3] 1.594<br>[4] 1.510 | 125.4 | 165.0 | 134.5 | 124.7<br>106.0 | 1.36    | 1.79    | 1.46    | 1.36<br>1.15 |

|                              |   |     |     |       |       |                                     |       |       |       |                         |      |      |      |                      |
|------------------------------|---|-----|-----|-------|-------|-------------------------------------|-------|-------|-------|-------------------------|------|------|------|----------------------|
| Snub Cube 111                | 3 | 111 | 56  | 1.776 | 1.648 | [3] 1.603<br>[4] 1.510              | 133.9 | 172.4 | 137.9 | 127.0<br>106.0          | 1.21 | 1.55 | 1.24 | 1.14<br>0.96         |
| Sub-Truncated Octahedron 116 | 3 | 116 | 78  | 1.688 | 1.601 | [4] 1.510<br>[6] 1.308              | 101.2 | 148.2 | 126.5 | 106.0<br>68.9           | 0.87 | 1.28 | 1.09 | 0.91<br>0.59         |
| Truncated Cuboctahedron 135  | 3 | 135 | 80  | 1.828 | 1.764 | [4] 1.741<br>[6] 1.649<br>[8] 1.510 | 150.8 | 188.2 | 169.0 | 162.5<br>138.2<br>106.0 | 1.12 | 1.39 | 1.25 | 1.20<br>1.02<br>0.79 |
| Sub-Rhombicuboctahedron 140  | 3 | 140 | 78  | 1.750 | 1.634 | [3] 1.594<br>[4] 1.510              | 125.4 | 165.0 | 134.5 | 124.7<br>106.0          | 0.90 | 1.18 | 0.96 | 0.89<br>0.76         |
| Cuboctahedron 147            | 3 | 147 | 92  | 2.135 | 1.849 | [3] 1.743<br>[4] 1.510              | 168.7 | 299.9 | 194.8 | 163.2<br>106.0          | 1.15 | 2.04 | 1.32 | 1.11<br>0.72         |
| Truncated Cube 164           | 3 | 164 | 102 | 2.225 | 2.135 | [3] 2.105<br>[8] 1.510              | 195.1 | 339.3 | 299.9 | 287.1<br>106.0          | 1.19 | 2.07 | 1.83 | 1.75<br>0.65         |
| Sub-Truncated Cube 171       | 3 | 171 | 108 | 2.225 | 2.135 | [3] 2.105<br>[8] 1.510              | 195.1 | 339.3 | 299.9 | 287.1<br>106.0          | 1.14 | 1.98 | 1.75 | 1.68<br>0.62         |
| Sub-Truncated Octahedron 140 | 4 | 140 | 96  | 2.143 | 2.033 | [4] 1.917<br>[6] 1.660              | 207.2 | 303.3 | 259.0 | 217.0<br>141.0          | 1.48 | 2.17 | 1.85 | 1.55<br>1.01         |

|                                 |   |     |     |       |       |           |       |       |       |       |      |      |      |      |
|---------------------------------|---|-----|-----|-------|-------|-----------|-------|-------|-------|-------|------|------|------|------|
| Sub-Rhombicuboctahedron 165     | 4 | 165 | 86  | 2.222 | 2.075 | [3] 2.024 | 256.7 | 337.9 | 275.3 | 255.3 | 1.56 | 2.05 | 1.67 | 1.55 |
|                                 |   |     |     |       |       | [4] 1.917 |       |       |       | 217.0 |      |      |      | 1.32 |
| Truncated Octahedron 201        | 4 | 201 | 122 | 2.143 | 2.033 | [4] 1.917 | 207.2 | 303.3 | 259.0 | 217.0 | 1.03 | 1.51 | 1.29 | 1.08 |
|                                 |   |     |     |       |       | [6] 1.660 |       |       |       | 141.0 |      |      |      | 0.70 |
| Sub-Cuboctahedron 260           | 4 | 260 | 144 | 2.711 | 2.348 | [3] 2.214 | 345.4 | 613.9 | 398.7 | 334.2 | 1.33 | 2.36 | 1.53 | 1.29 |
|                                 |   |     |     |       |       | [4] 1.917 |       |       |       | 217.0 |      |      |      | 0.83 |
| Sub-Truncated Cuboctahedron 236 | 4 | 236 | 120 | 2.321 | 2.239 | [4] 2.211 | 308.7 | 385.2 | 345.9 | 332.7 | 1.31 | 1.63 | 1.47 | 1.41 |
|                                 |   |     |     |       |       | [6] 2.094 |       |       |       | 282.8 |      |      |      | 1.20 |
|                                 |   |     |     |       |       | [8] 1.917 |       |       |       | 217.0 |      |      |      | 0.92 |
| Sub-Rhombicuboctahedron 249     | 4 | 249 | 114 | 2.222 | 2.075 | [3] 2.024 | 256.7 | 337.9 | 275.3 | 255.3 | 1.03 | 1.36 | 1.11 | 1.03 |
|                                 |   |     |     |       |       | [4] 1.917 |       |       |       | 217.0 |      |      |      | 0.87 |
| Sub-Snub Cube 249               | 4 | 249 | 114 | 2.255 | 2.093 | [3] 2.036 | 274.0 | 353.0 | 282.3 | 259.9 | 1.10 | 1.42 | 1.13 | 1.04 |
|                                 |   |     |     |       |       | [4] 1.917 |       |       |       | 217.0 |      |      |      | 0.87 |
| Sub-Snub Cube 268               | 4 | 268 | 128 | 2.255 | 2.093 | [3] 2.036 | 274.0 | 353.0 | 282.3 | 259.9 | 1.02 | 1.32 | 1.05 | 0.97 |
|                                 |   |     |     |       |       | [4] 1.917 |       |       |       | 217.0 |      |      |      | 0.81 |
| Sub-Truncated Cuboctahedron 297 | 4 | 297 | 162 | 2.321 | 2.239 | [4] 2.211 | 308.7 | 385.2 | 345.9 | 332.7 | 1.04 | 1.30 | 1.16 | 1.12 |

|                                    |   |     |     |       |       |           |       |        |       |       |      |      |      |      |
|------------------------------------|---|-----|-----|-------|-------|-----------|-------|--------|-------|-------|------|------|------|------|
|                                    |   |     |     |       |       | [6] 2.094 |       |        |       | 282.8 |      |      |      | 0.95 |
|                                    |   |     |     |       |       | [8] 1.917 |       |        |       | 217.0 |      |      |      | 0.73 |
| Cuboctahedron 309                  | 4 | 309 | 162 | 2.711 | 2.348 | [3] 2.214 | 345.4 | 613.9  | 398.7 | 334.2 | 1.12 | 1.99 | 1.29 | 1.08 |
|                                    |   |     |     |       |       | [4] 1.917 |       |        |       | 217.0 |      |      |      | 0.70 |
| Sub-Truncated<br>Cuboctahedron 316 | 4 | 316 | 152 | 2.321 | 2.239 | [4] 2.211 | 308.7 | 385.2  | 345.9 | 332.7 | 0.98 | 1.22 | 1.09 | 1.05 |
|                                    |   |     |     |       |       | [6] 2.094 |       |        |       | 282.8 |      |      |      | 0.90 |
|                                    |   |     |     |       |       | [8] 1.917 |       |        |       | 217.0 |      |      |      | 0.69 |
| Sub-Rhombicubocta-<br>hedron 321   | 4 | 321 | 150 | 2.222 | 2.075 | [3] 2.024 | 256.7 | 337.9  | 275.3 | 255.3 | 0.80 | 1.05 | 0.86 | 0.80 |
|                                    |   |     |     |       |       | [4] 1.917 |       |        |       | 217.0 |      |      |      | 0.68 |
| Cuboctahedron 340                  | 4 | 340 | 176 | 2.711 | 2.348 | [3] 2.214 | 345.4 | 613.9  | 398.7 | 334.2 | 1.02 | 1.81 | 1.17 | 0.98 |
|                                    |   |     |     |       |       | [4] 1.917 |       |        |       | 217.0 |      |      |      | 0.64 |
| Truncated Cube 357                 | 4 | 357 | 186 | 2.825 | 2.711 | [3] 2.672 | 399.5 | 694.6  | 613.9 | 587.7 | 1.12 | 1.95 | 1.72 | 1.65 |
|                                    |   |     |     |       |       | [8] 1.917 |       |        |       | 217.0 |      |      |      | 0.61 |
| Sub-Cube 364                       | 4 | 364 | 192 | 3.321 | 2.711 | 1.917     | 414.5 | 1127.8 | 613.9 | 217.0 | 1.14 | 3.10 | 1.69 | 0.60 |
| Sub-Octahedron 225                 | 5 | 225 | 140 | 2.324 | 1.644 | 1.342     | 123.1 | 386.8  | 136.8 | 74.4  | 0.55 | 1.72 | 0.61 | 0.33 |
| Sub-Rhombicubocta-<br>hedron 266   | 5 | 266 | 126 | 2.694 | 2.516 | [3] 2.454 | 457.5 | 602.2  | 490.5 | 455.1 | 1.72 | 2.26 | 1.84 | 1.71 |
|                                    |   |     |     |       |       | [4] 2.324 |       |        |       | 386.8 |      |      |      | 1.45 |
| Sub-Truncated<br>Octahedron 314    | 5 | 314 | 174 | 2.599 | 2.465 | [4] 2.324 | 369.3 | 540.5  | 461.6 | 386.8 | 1.18 | 1.72 | 1.47 | 1.23 |

|                                 |   |     |     |       |       |           |       |        |       |       |       |      |      |      |      |      |
|---------------------------------|---|-----|-----|-------|-------|-----------|-------|--------|-------|-------|-------|------|------|------|------|------|
| Sub-Rhombicuboctahedron 369     | 5 | 369 | 168 | 2.694 | 2.516 | [6] 2.013 | 457.5 | 602.2  | 490.5 | 455.1 | 251.2 | 1.24 | 1.63 | 1.33 | 1.23 | 0.80 |
| Rhombicuboctahedron 394         | 5 | 394 | 158 | 2.694 | 2.516 | [3] 2.454 | 457.5 | 602.2  | 490.5 | 455.1 | 386.8 | 1.16 | 1.53 | 1.25 | 1.15 | 1.05 |
| Sub-Snub Cube 394               | 5 | 394 | 158 | 2.733 | 2.537 | [4] 2.324 | 488.4 | 629.1  | 503.0 | 463.2 | 386.8 | 1.24 | 1.60 | 1.28 | 1.18 | 0.98 |
| Sub-Truncated Octahedron 405    | 5 | 405 | 204 | 2.599 | 2.465 | [3] 2.468 | 369.3 | 540.5  | 461.6 | 463.2 | 386.8 | 0.91 | 1.33 | 1.14 | 0.96 | 0.98 |
| Snub Cube 429                   | 5 | 429 | 132 | 2.733 | 2.537 | [4] 2.324 | 488.4 | 629.1  | 503.0 | 463.2 | 251.2 | 1.14 | 1.47 | 1.17 | 1.08 | 0.62 |
| Sub-Truncated Cuboctahedron 466 | 5 | 466 | 230 | 2.814 | 2.715 | [3] 2.468 | 550.2 | 686.5  | 616.5 | 463.2 | 386.8 | 1.18 | 1.47 | 1.32 | 1.27 | 0.90 |
| Sub-Cuboctahedron 490           | 5 | 490 | 230 | 3.287 | 2.847 | [4] 2.680 | 615.6 | 1094.1 | 710.5 | 595.5 | 504.0 | 1.26 | 2.23 | 1.45 | 1.22 | 1.08 |
| Sub-Truncated                   | 5 | 501 | 204 | 2.814 | 2.715 | [8] 2.324 | 550.2 | 686.5  | 616.5 | 595.5 | 386.8 | 1.10 | 1.37 | 1.23 | 1.18 | 0.83 |
|                                 |   |     |     |       |       | [4] 2.324 |       |        |       | 386.8 |       |      |      |      |      | 0.79 |
|                                 |   |     |     |       |       | [4] 2.680 |       |        |       | 592.9 |       |      |      |      |      | 1.18 |



|                                 |   |     |     |       |       |           |       |        |       |       |      |      |      |      |
|---------------------------------|---|-----|-----|-------|-------|-----------|-------|--------|-------|-------|------|------|------|------|
| Cuboctahedron 501               |   |     |     |       |       | [6] 2.539 |       |        |       | 504.0 |      |      |      | 1.01 |
|                                 |   |     |     |       |       | [8] 2.324 |       |        |       | 386.8 |      |      |      | 0.77 |
| Sub-Rhombicuboctahedron 514     | 5 | 514 | 198 | 2.694 | 2.516 | [3] 2.454 | 457.5 | 602.2  | 490.5 | 455.1 | 0.89 | 1.17 | 0.95 | 0.89 |
|                                 |   |     |     |       |       | [4] 2.324 |       |        |       | 386.8 |      |      |      | 0.75 |
| Sub-Cuboctahedron 549           | 5 | 549 | 240 | 3.287 | 2.847 | [3] 2.684 | 615.6 | 1094.1 | 710.5 | 595.5 | 1.12 | 1.99 | 1.29 | 1.08 |
|                                 |   |     |     |       |       | [4] 2.324 |       |        |       | 386.8 |      |      |      | 0.70 |
| Cuboctahedron 561               | 5 | 561 | 252 | 3.287 | 2.847 | [3] 2.684 | 615.6 | 1094.1 | 710.5 | 595.5 | 1.10 | 1.95 | 1.27 | 1.06 |
|                                 |   |     |     |       |       | [4] 2.324 |       |        |       | 386.8 |      |      |      | 0.69 |
| Sub-Truncated Cuboctahedron 586 | 5 | 586 | 246 | 2.814 | 2.715 | [4] 2.680 | 550.2 | 686.5  | 616.5 | 592.9 | 0.94 | 1.18 | 1.06 | 1.02 |
|                                 |   |     |     |       |       | [6] 2.539 |       |        |       | 504.0 |      |      |      | 0.86 |
|                                 |   |     |     |       |       | [8] 2.324 |       |        |       | 386.8 |      |      |      | 0.66 |
| Sub-Truncated Cuboctahedron 605 | 5 | 605 | 248 | 2.814 | 2.715 | [4] 2.680 | 550.2 | 686.5  | 616.5 | 592.9 | 0.91 | 1.13 | 1.02 | 0.98 |
|                                 |   |     |     |       |       | [6] 2.539 |       |        |       | 504.0 |      |      |      | 0.83 |
|                                 |   |     |     |       |       | [8] 2.324 |       |        |       | 386.8 |      |      |      | 0.64 |
| Sub-Cuboctahedron 610           | 5 | 610 | 270 | 3.287 | 2.847 | [3] 2.684 | 615.6 | 1094.1 | 710.5 | 595.5 | 1.01 | 1.79 | 1.16 | 0.98 |
|                                 |   |     |     |       |       | [4] 2.324 |       |        |       | 386.8 |      |      |      | 0.63 |

|                                    |   |     |     |       |       |           |       |        |        |        |      |      |      |      |
|------------------------------------|---|-----|-----|-------|-------|-----------|-------|--------|--------|--------|------|------|------|------|
| Sub-Truncated Cube<br>641          | 5 | 641 | 284 | 3.425 | 3.287 | [3] 3.240 | 711.9 | 1238.0 | 1094.0 | 1047.4 | 1.11 | 1.93 | 1.71 | 1.63 |
|                                    |   |     |     |       |       | [8] 2.324 |       |        |        | 386.8  |      |      |      | 0.60 |
| Sub-Truncated Cube<br>658          | 5 | 658 | 294 | 3.425 | 3.287 | [3] 3.240 | 711.9 | 1238.0 | 1094.0 | 1047.4 | 1.08 | 1.88 | 1.66 | 1.59 |
|                                    |   |     |     |       |       | [8] 2.324 |       |        |        | 386.8  |      |      |      | 0.59 |
| Sub-Octahedron 338                 | 6 | 338 | 192 | 2.732 | 1.932 | 1.577     | 199.9 | 627.9  | 222.0  | 120.8  | 0.59 | 1.86 | 0.66 | 0.36 |
| Sub-Octahedron 399                 | 6 | 394 | 174 | 2.732 | 1.932 | 1.577     | 199.9 | 627.9  | 222.0  | 120.8  | 0.51 | 1.59 | 0.56 | 0.31 |
| Sub-Truncated<br>Octahedron 459    | 6 | 459 | 234 | 3.054 | 2.898 | [4] 2.732 | 599.4 | 877.5  | 749.3  | 627.9  | 1.31 | 1.91 | 1.63 | 1.37 |
|                                    |   |     |     |       |       | [6] 2.366 |       |        |        | 407.8  |      |      |      | 0.89 |
| Rhombicuboctahedron<br>579         | 6 | 579 | 210 | 3.166 | 2.957 | [3] 2.884 | 742.7 | 977.5  | 796.3  | 738.7  | 1.28 | 1.69 | 1.38 | 1.28 |
|                                    |   |     |     |       |       | [4] 2.732 |       |        |        | 627.9  |      |      |      | 1.08 |
| Truncated Octahedron<br>586        | 6 | 586 | 272 | 3.054 | 2.898 | [4] 2.732 | 599.4 | 877.5  | 749.3  | 627.9  | 1.02 | 1.50 | 1.28 | 1.07 |
|                                    |   |     |     |       |       | [6] 2.366 |       |        |        | 407.8  |      |      |      | 0.70 |
| Sub-Truncated<br>Cuboctahedron 675 | 6 | 675 | 270 | 3.308 | 3.191 | [4] 3.150 | 893.1 | 1114.4 | 1000.8 | 962.5  | 1.32 | 1.65 | 1.48 | 1.43 |
|                                    |   |     |     |       |       | [6] 2.984 |       |        |        | 818.2  |      |      |      | 1.21 |
|                                    |   |     |     |       |       | [8] 2.732 |       |        |        | 627.9  |      |      |      | 0.93 |
| Sub-Rhombicubocta-                 | 6 | 730 | 264 | 3.166 | 2.957 | [3] 2.884 | 742.7 | 977.5  | 796.3  | 738.7  | 1.02 | 1.34 | 1.09 | 1.01 |

|                              |   |     |     |       |       |           |       |        |        |       |      |      |      |      |
|------------------------------|---|-----|-----|-------|-------|-----------|-------|--------|--------|-------|------|------|------|------|
| hedron 730                   |   |     |     |       |       | [4] 2.732 |       |        |        | 627.9 |      |      |      | 0.86 |
| Rhombicubocta-hedron 755     | 6 | 755 | 254 | 3.166 | 2.957 | [3] 2.884 | 742.7 | 977.5  | 796.3  | 738.7 | 0.98 | 1.29 | 1.05 | 0.98 |
| Snub Cube 755                | 6 | 755 | 254 | 3.213 | 2.982 | [3] 2.901 | 792.8 | 1021.2 | 816.6  | 752.0 | 1.05 | 1.35 | 1.08 | 1.00 |
| Sub-Truncated Octahedron 802 | 6 | 802 | 312 | 3.054 | 2.898 | [4] 2.732 | 599.4 | 877.5  | 749.3  | 627.9 | 0.75 | 1.09 | 0.93 | 0.78 |
| Truncated Cuboctahedron 863  | 6 | 863 | 314 | 3.308 | 3.191 | [4] 3.150 | 893.1 | 1114.4 | 1000.8 | 962.5 | 1.03 | 1.29 | 1.16 | 1.12 |
| Sub-Truncated Octahedron 898 | 6 | 898 | 312 | 3.054 | 2.898 | [4] 2.732 | 599.4 | 877.5  | 749.3  | 627.9 | 0.67 | 0.98 | 0.84 | 0.70 |
| Sub-Cuboctahedron 911        | 6 | 911 | 350 | 3.863 | 3.346 | [3] 3.154 | 999.4 | 1776.0 | 1153.5 | 966.8 | 1.10 | 1.95 | 1.27 | 1.06 |
| Cuboctahedron 923            | 6 | 923 | 362 | 3.863 | 3.346 | [3] 3.154 | 999.4 | 1776.0 | 1153.5 | 966.8 | 1.08 | 1.92 | 1.25 | 1.05 |
|                              |   |     |     |       |       | [4] 2.732 |       |        |        | 627.9 |      |      |      | 0.69 |
|                              |   |     |     |       |       | [4] 2.732 |       |        |        | 627.9 |      |      |      | 0.68 |

|                                    |   |      |     |       |       |           |        |        |        |        |      |      |      |      |      |
|------------------------------------|---|------|-----|-------|-------|-----------|--------|--------|--------|--------|------|------|------|------|------|
| Sub-Truncated<br>Cuboctahedron 970 | 6 | 970  | 360 | 3.308 | 3.191 | [4] 3.150 | 893.1  | 1114.4 | 1000.8 | 962.5  | 0.92 | 1.15 | 1.03 | 0.99 |      |
|                                    |   |      |     |       |       | [6] 2.984 |        |        |        | 818.2  |      |      |      |      | 0.84 |
|                                    |   |      |     |       |       | [8] 2.732 |        |        |        | 627.9  |      |      |      |      | 0.65 |
| Sub-Truncated Cube<br>1043         | 6 | 1043 | 402 | 4.026 | 3.863 | [3] 3.808 | 1155.7 | 2009.7 | 1776.0 | 1700.3 | 1.11 | 1.93 | 1.70 | 1.63 |      |
|                                    |   |      |     |       |       | [8] 2.732 |        |        |        | 627.9  |      |      |      |      | 0.60 |
| Truncated Cube 1074                | 6 | 1074 | 416 | 4.026 | 3.863 | [3] 3.808 | 1155.7 | 2009.7 | 1776.0 | 1700.3 | 1.08 | 1.87 | 1.65 | 1.58 |      |
|                                    |   |      |     |       |       | [8] 2.732 |        |        |        | 627.9  |      |      |      |      | 0.58 |
| Sub-Truncated Cube<br>1091         | 6 | 1091 | 426 | 4.026 | 3.863 | [3] 3.808 | 1155.7 | 2009.7 | 1776.0 | 1700.3 | 1.06 | 1.84 | 1.63 | 1.56 |      |
|                                    |   |      |     |       |       | [8] 2.732 |        |        |        | 627.9  |      |      |      |      | 0.58 |

## Section S5 – Example calculations

The expected structures (closest or best match) of several gold nanoparticles synthesized by our group<sup>[S2-S5]</sup> are summarized in Table S5 (high resolution TEM images are available free of charge in the electronic supporting information in most cases). The models used are listed and those highlighted in red font were considered the closest match to the gold nanoparticles experimentally observed in the TEM images. The gold nanoparticles Au1, Au2, Au4, Au5, Au10, and Au11 (No. 7, 8, 10, 11, 16, 17) had TEM images with sufficiently high resolution (see images in the original papers and their supporting information), making the choice for the most appropriate model easy (as outlined in the main text, a sufficiently high quality of TEM images is important). The structures and compositions of the other gold nanoparticles were estimated from their size distribution histograms.

The estimated core structures of the gold nanoparticles reported by Negishi *et al.*<sup>[S6]</sup> are shown in Table S6. Their structures have previously been estimated *via* DFT calculations. Our models and tables help analyze them and select the best match for the core structure.

**Table S5.** Lists of gold nanoparticles and their model structures.

| No.               | Ref.  | Au-NP | $D$ /<br>nm        | Model                  | $D_c$ /<br>nm | $D_m$ /<br>nm | $D_i$ /<br>nm | $h$ /<br>nm | $w$ /<br>nm |       |       |  |  |
|-------------------|-------|-------|--------------------|------------------------|---------------|---------------|---------------|-------------|-------------|-------|-------|--|--|
| 1                 | [S2]  | Au-R1 | $2.47 \pm$<br>0.18 | Truncated              | 2.671         | 2.647         | [4]           |             |             |       |       |  |  |
|                   |       |       |                    | Icosidodecahedron 437  |               |               |               | 2.624       |             |       |       |  |  |
|                   |       |       |                    |                        |               |               |               |             | [6]         |       |       |  |  |
|                   |       |       |                    |                        |               |               |               |             | 2.577       |       |       |  |  |
|                   |       |       |                    |                        |               |               |               |             | [12]        |       |       |  |  |
|                   |       |       |                    |                        |               |               |               |             | 2.417       |       |       |  |  |
|                   |       |       |                    | Sub-Truncated          |               |               | 2.814         | 2.715       | [4]         |       |       |  |  |
|                   |       |       |                    | Cuboctahedron 466      |               |               |               |             |             | 2.680 |       |  |  |
|                   |       |       |                    |                        |               |               |               |             |             |       | [6]   |  |  |
|                   |       |       |                    |                        |               |               |               |             |             |       | 2.539 |  |  |
|                   |       |       | [8]                |                        |               |               |               |             |             |       |       |  |  |
|                   |       |       | 2.324              |                        |               |               |               |             |             |       |       |  |  |
| Sub-Truncated     | 2.738 | 2.681 | [5]                |                        |               |               |               |             |             |       |       |  |  |
| Icosahedron 489   |       |       |                    | 2.571                  |               |               |               |             |             |       |       |  |  |
|                   |       |       |                    |                        | [6]           |               |               |             |             |       |       |  |  |
|                   |       |       |                    |                        | 2.505         |               |               |             |             |       |       |  |  |
|                   |       |       |                    |                        |               |               |               |             |             |       |       |  |  |
| 2                 | [S2]  | Au-R2 | $2.13 \pm$<br>0.18 | Sub-                   | 2.182         | 2.126         | [3]           |             |             |       |       |  |  |
|                   |       |       |                    | Rhombicosidodecahedron |               |               |               | 2.107       |             |       |       |  |  |
|                   |       |       |                    | 267                    |               |               |               |             |             |       |       |  |  |
|                   |       |       |                    |                        |               |               |               |             | [4]         |       |       |  |  |
|                   |       |       |                    |                        |               |               |               |             | 2.069       |       |       |  |  |
|                   |       |       |                    |                        |               |               |               |             | [5]         |       |       |  |  |
|                   |       |       |                    |                        |               |               |               |             | 2.018       |       |       |  |  |
|                   |       |       |                    | Sub-Truncated          |               |               | 2.321         | 2.239       | [4]         |       |       |  |  |
| Cuboctahedron 297 |       | 2.211 |                    |                        |               |               |               |             |             |       |       |  |  |
|                   |       |       | [6]                |                        |               |               |               |             |             |       |       |  |  |
|                   |       |       | 2.094              |                        |               |               |               |             |             |       |       |  |  |

|   |      |       |                |                              |       |       |       |      |      |
|---|------|-------|----------------|------------------------------|-------|-------|-------|------|------|
|   |      |       |                |                              |       |       | [8]   |      |      |
|   |      |       |                | Icosahedron 309              | 2.592 | 2.205 | 2.060 |      |      |
| 3 | [S2] | Au-R3 | 1.24 ±<br>0.28 | Icosahedron 55               | 1.440 | 1.225 | 1.144 |      |      |
|   |      |       |                | Ino's Decahedron 55          |       |       |       | 1.44 | 1.32 |
|   |      |       |                | Cuboctahedron 55             | 1.559 | 1.350 | [3]   |      |      |
|   |      |       |                |                              |       |       | 1.273 |      |      |
|   |      |       |                |                              |       |       | [4]   |      |      |
|   |      |       |                |                              |       |       | 1.103 |      |      |
| 4 |      | Au-S1 | 1.73 ±<br>0.20 | Icosidodecahedron 145        | 1.867 | 1.776 | [3]   |      |      |
|   |      |       |                |                              |       |       | 1.744 |      |      |
|   |      |       |                |                              |       |       | [5]   |      |      |
|   |      |       |                | Icosahedron 147              | 2.016 | 1.715 | 1.602 |      |      |
|   |      |       |                | Cuboctahedron 147            | 2.135 | 1.849 | [3]   |      |      |
|   |      |       |                |                              |       |       | 1.743 |      |      |
|   |      |       |                |                              |       |       | [4]   |      |      |
|   |      |       |                |                              |       |       | 1.510 |      |      |
|   |      |       |                | Dodecahedron 165             | 2.175 | 2.031 | 1.728 |      |      |
| 5 | [S2] | Au-S2 | 1.08 ±<br>0.24 | Marks' Decahedron 29         |       |       |       | 1.15 | 1.09 |
| 6 | [S2] | Au-S3 | 1.09 ±<br>0.23 | Dodecahedron 33              | 1.203 | 1.124 | 0.956 |      |      |
|   |      |       |                | Truncated Octahedron 38      | 1.233 | 1.169 | [4]   |      |      |
|   |      |       |                |                              |       |       | 1.103 |      |      |
|   |      |       |                |                              |       |       | [6]   |      |      |
|   |      |       |                |                              |       |       | 0.955 |      |      |
|   |      |       |                | Ino's Decahedron 39          |       |       |       | 1.15 | 1.32 |
| 7 | [S3] | Au1   | 1.65 ±<br>0.39 | Ino's Decahedron 116         |       |       |       | 1.73 | 1.83 |
|   |      |       |                | Marks' Decahedron 146        |       |       |       | 1.73 | 2.12 |
|   |      |       |                | Truncated Icosahedron 135    | 1.758 | 1.722 | [5]   |      |      |
|   |      |       |                |                              |       |       | 1.651 |      |      |
|   |      |       |                |                              |       |       | [6]   |      |      |
|   |      |       |                |                              |       |       | 1.608 |      |      |
|   |      |       |                | Sub-Truncated Octahedron 116 | 1.688 | 1.601 | [4]   |      |      |
|   |      |       |                |                              |       |       | 1.510 |      |      |
|   |      |       |                |                              |       |       | [6]   |      |      |
|   |      |       |                |                              |       |       | 1.308 |      |      |
|   |      |       |                | Cuboctahedron 147            | 2.135 | 1.849 | [3]   |      |      |
|   |      |       |                |                              |       |       | 1.743 |      |      |
|   |      |       |                |                              |       |       | [4]   |      |      |
|   |      |       |                |                              |       |       | 1.510 |      |      |
| 8 | [S3] | Au2   | 1.54 ±<br>0.38 | Ino's Decahedron 71          |       |       |       | 1.73 | 1.32 |

|    |          |     |                |                              |       |       |                                              |      |      |
|----|----------|-----|----------------|------------------------------|-------|-------|----------------------------------------------|------|------|
|    |          |     |                | Marks' Decahedron 75         |       |       |                                              | 1.44 | 1.61 |
|    |          |     |                | Dodecahedron 75              | 1.680 | 1.570 | 1.335                                        |      |      |
|    |          |     |                | Sub-Truncated Octahedron 116 | 1.688 | 1.601 | [4]<br>1.510<br>[6]<br>1.308                 |      |      |
| 9  | [S3, S4] | Au3 | 3.50 ± 0.81    | — <sup>a</sup>               |       |       |                                              |      |      |
| 10 |          | Au4 | 1.20 ± 0.23    | Marks' Decahedron 29         |       |       |                                              | 1.15 | 1.09 |
|    |          |     |                | Ino's Decahedron 39          |       |       |                                              | 1.15 | 1.32 |
|    |          |     |                | Icosidodecahedron 43         | 1.268 | 1.206 | [3]<br>1.184<br>[4]<br>1.079                 |      |      |
|    |          |     |                | Truncated Octahedron 38      | 1.233 | 1.169 | [4]<br>1.103<br>[6]<br>0.955                 |      |      |
| 11 | [S3]     | Au5 | 1.75 ± 0.40    | Marks' Decahedron 146        |       |       |                                              | 1.73 | 2.12 |
|    |          |     |                | Ino's Decahedron 147         |       |       |                                              | 2.02 | 1.83 |
|    |          |     |                | Icosahedron 147              | 2.016 | 1.715 | 1.602                                        |      |      |
|    |          |     |                | Cuboctahedron 147            | 2.135 | 1.849 | [3]<br>1.743<br>[4]<br>1.510                 |      |      |
|    |          |     |                | Truncated Octahedron 201     | 2.143 | 2.033 | [4]<br>1.917<br>[6]<br>1.660                 |      |      |
| 12 | [S3]     | Au6 | — <sup>a</sup> |                              |       |       |                                              |      |      |
| 13 | [S3]     | Au7 | 1.58 ± 0.44    | Marks' Decahedron 101        |       |       |                                              | 1.44 | 1.83 |
|    |          |     |                | Rhombicosidodecahedron 115   | 1.717 | 1.674 | [3]<br>1.659<br>[4]<br>1.629<br>[5]<br>1.588 |      |      |
|    |          |     |                | Sub-Truncated Octahedron 116 | 1.688 | 1.601 | [4]<br>1.510<br>[6]<br>1.308                 |      |      |
| 14 | [S3]     | Au8 | 1.93 ± 0.47    | Marks' Decahedron 238        |       |       |                                              | 2.30 | 2.12 |

|    |      |      |                 |                              |       |       |              |      |      |
|----|------|------|-----------------|------------------------------|-------|-------|--------------|------|------|
|    |      |      |                 | Icosidodecahedron 237        | 2.268 | 2.157 | [3]<br>2.119 |      |      |
|    |      |      |                 |                              |       |       | [5]<br>1.930 |      |      |
|    |      |      |                 | Truncated Octahedron 201     | 2.143 | 2.033 | [4]<br>1.917 |      |      |
|    |      |      |                 |                              |       |       | [6]<br>1.660 |      |      |
|    |      |      |                 | Sub-Rhombicuboctahedron 249  | 2.222 | 2.075 | [3]<br>2.024 |      |      |
|    |      |      |                 |                              |       |       | [4]<br>1.917 |      |      |
| 15 | [S3] | Au9  | $1.31 \pm 0.29$ | Ino's Decahedron 71          |       |       |              | 1.73 | 1.32 |
|    |      |      |                 | Icosahedron 55               | 1.440 | 1.225 | 1.144        |      |      |
|    |      |      |                 | Cuboctahedron 55             | 1.559 | 1.350 | [3]<br>1.273 |      |      |
|    |      |      |                 |                              |       |       | [4]<br>1.103 |      |      |
| 16 | [S3] | Au10 | $1.57 \pm 0.43$ | Marks' Decahedron 101        |       |       |              | 1.73 | 1.61 |
|    |      |      |                 | Rhombicosidodecahedron 115   | 1.717 | 1.674 | [3]<br>1.659 |      |      |
|    |      |      |                 |                              |       |       | [4]<br>1.629 |      |      |
|    |      |      |                 |                              |       |       | [5]<br>1.588 |      |      |
|    |      |      |                 | Sub-Truncated Octahedron 116 | 1.688 | 1.601 | [4]<br>1.510 |      |      |
|    |      |      |                 |                              |       |       | [6]<br>1.308 |      |      |
| 17 | [S3] | Au11 | $1.61 \pm 0.42$ | Marks' Decahedron 101        |       |       |              | 1.73 | 1.61 |
|    |      |      |                 | Truncated Icosahedron 135    | 1.758 | 1.722 | [5]<br>1.651 |      |      |
|    |      |      |                 |                              |       |       | [6]<br>1.608 |      |      |
|    |      |      |                 | Icosahedron 147              | 2.016 | 1.715 | 1.602        |      |      |
|    |      |      |                 | Sub-Truncated Octahedron 116 | 1.688 | 1.601 | [4]<br>1.510 |      |      |
|    |      |      |                 |                              |       |       | [6]<br>1.308 |      |      |
|    |      |      |                 | Cuboctahedron 147            | 2.135 | 1.849 | [3]<br>1.743 |      |      |
|    |      |      |                 |                              |       |       | [4]          |      |      |



|    |      |       |      |                    |       |       |                                                                                                                                                |
|----|------|-------|------|--------------------|-------|-------|------------------------------------------------------------------------------------------------------------------------------------------------|
| 18 | [S5] | AuNP1 | 4.09 | Cuboctahedron 1415 | 4.439 | 3.844 | 1.510<br>[3]<br>3.625<br>[4]<br>3.139<br>Sub-Truncated<br>Cuboctahedron 1416<br>3.801<br>3.667<br>[4]<br>3.619<br>[6]<br>3.429<br>[8]<br>3.139 |
|----|------|-------|------|--------------------|-------|-------|------------------------------------------------------------------------------------------------------------------------------------------------|

<sup>a</sup> Could not be isolated in pure form (and analyzed here) due to amphiphilicity of the resulting mixed-monolayer-protected Au NPs.

**Table S6.** Lists of gold nanoparticles and their core structures.

| No. | Ref. | Au-NP                                               | $D$ / nm     | Model                              | $D_c$ / nm | $D_m$ / nm | $D_i$ / nm                                   |
|-----|------|-----------------------------------------------------|--------------|------------------------------------|------------|------------|----------------------------------------------|
| 19  | [S6] | Au <sub>226</sub> (SC <sub>12</sub> ) <sub>76</sub> | 2.0 ±<br>0.5 | Truncated Octahedron 201           | 2.143      | 2.033      | [4]<br>1.917<br>[6]<br>1.660                 |
|     |      |                                                     |              | Sub-Truncated<br>Cuboctahedron 236 | 2.321      | 2.239      | [4]<br>2.211<br>[6]<br>2.094                 |
|     |      |                                                     |              |                                    |            |            | [8]<br>1.917                                 |
|     |      |                                                     |              |                                    |            |            | [4]<br>2.211<br>[6]<br>2.094<br>[8]<br>1.917 |
| 20  | [S6] | Au <sub>253</sub> (SC <sub>12</sub> ) <sub>90</sub> | 2.1 ±<br>0.4 | Sub-Truncated<br>Cuboctahedron 236 | 2.321      | 2.239      | [4]<br>2.211<br>[6]<br>2.094<br>[8]<br>1.917 |
|     |      |                                                     |              | Sub-<br>Rhombicuboctahedron 249    | 2.222      | 2.075      | [3]<br>2.024<br>[4]<br>1.917                 |
|     |      |                                                     |              |                                    |            |            | [4]<br>2.211<br>[6]<br>2.094<br>[8]<br>1.917 |
|     |      |                                                     |              |                                    |            |            | [3]<br>2.214<br>[4]                          |
| 21  | [S6] | Au <sub>329</sub> (SC <sub>12</sub> ) <sub>84</sub> | 2.2 ±<br>0.4 | Sub-Truncated<br>Cuboctahedron 297 | 2.321      | 2.239      | [4]<br>2.211<br>[6]<br>2.094<br>[8]<br>1.917 |
|     |      |                                                     |              | Cuboctahedron 309                  | 2.711      | 2.348      | [3]<br>2.214<br>[4]                          |
|     |      |                                                     |              |                                    |            |            | [4]<br>2.211<br>[6]<br>2.094<br>[8]<br>1.917 |
|     |      |                                                     |              |                                    |            |            | [3]<br>2.214<br>[4]                          |

|    |      |                                                      |              |                                    |       |       |                                                       |
|----|------|------------------------------------------------------|--------------|------------------------------------|-------|-------|-------------------------------------------------------|
|    |      |                                                      |              | Sub-Truncated<br>Cuboctahedron 316 | 2.321 | 2.239 | 1.917<br>[4]<br>2.211<br>[6]<br>2.094<br>[8]<br>1.917 |
| 22 | [S6] | Au <sub>356</sub> (SC <sub>12</sub> ) <sub>112</sub> | 2.2 ±<br>0.3 | Cuboctahedron 340                  | 2.711 | 2.348 | [3]<br>2.214<br>[4]<br>1.917                          |
|    |      |                                                      |              | Sub-Truncated Octahedron<br>314    | 2.599 | 2.465 | [4]<br>2.324<br>[6]<br>2.013                          |
| 23 | [S6] | Au <sub>520</sub> (SC <sub>12</sub> ) <sub>130</sub> | 2.4 ±<br>0.2 | Sub-Truncated<br>Cuboctahedron 466 | 2.814 | 2.715 | [4]<br>2.680<br>[6]<br>2.539<br>[8]<br>2.324          |
|    |      |                                                      |              | Sub-Cuboctahedron 490              | 3.287 | 2.847 | [3]<br>2.684<br>[4]<br>2.324                          |
|    |      |                                                      |              | Sub-Truncated<br>Cuboctahedron 501 | 2.814 | 2.715 | [4]<br>2.680<br>[6]<br>2.539<br>[8]<br>2.324          |

### Section S6 – xyz Coordinates

The xyz-coordinates for all gold nanoclusters are provided as separate electronic supplementary materials. These xyz-coordinate files are provided in standard format that can be analyzed just like crystal structures using CIF format.

### References

- [S1] Models and equations from: Wolfram MathWorld, <http://mathworld.wolfram.com/> and Visual Polyhedra, <http://dmccoey.com/polyhedra/index.html>

- [S2] Mori, T.; Sharma, A.; Hegmann, T. Significant Enhancement of the Chiral Correlation Lengths in Nematic Liquid Crystals by Gold Nanoparticle Surfaces Featuring Axially Chiral Binaphthyl Ligands. *ACS Nano* **10**, 1552-1564 (2016).
- [S3] Qi, H.; Hegmann, T. Post-Synthesis Racemization and Place Exchange Reactions. Another Step to Unravel The Origin of Chirality for Chiral Ligand-Capped Gold Nanoparticles. *J. Am. Chem. Soc.* **130**, 14201-14206 (2008).
- [S4] Qi, H.; Hegmann, T. Formation of Periodic Stripe Patterns in Nematic Liquid Crystals Doped with Functionalized Gold Nanoparticles. *J. Mater. Chem.* **16**, 4197-4205 (2006).
- [S5] Mirzaei, J.; Urbanski, M.; Kitzerow, H.-S.; Hegmann, T. Synthesis of Liquid Crystal Silane Functionalized Gold Nanoparticles and Their Effects on Optical and Electro-Optic Properties of a Structurally Related Nematic Liquid Crystal. *ChemPhysChem* **15**, 1381-1394 (2014).
- [S6] Negishi, Y.; Nakazaki, T.; Malola, S.; Takano, S.; Niihori, Y.; Kurashige, W.; Yamazoe, S.; Tsukuda, T.; Häkkinen, H. A Critical Size for Emergence of Nonbulk Electronic and Geometric Structures in Dodecanethiolate-Protected Au Clusters. *J. Am. Chem. Soc.* **137**, 1206-1212 (2015).
